# Supplementary material for: Outcomes of dysvascular partial foot amputation and how these compare to transtibial amputation: a systematic review for the development of shared decision-making resources
Source: Syst Rev. 2017 Mar 14;6:54. doi: 10.1186/s13643-017-0433-7 (PMC5348872; doi:10.1186/s13643-017-0433-7)
Supplement: Additional file 2: — Data extraction. (XLSX 146 kb) [file 13643_2017_433_MOESM2_ESM.xlsx]

## Sheet: 1. Wound healing
									Study overview							Participants - PFA														Participants - TTA							Outcome (repeat blocks of rows as necessary for each outcome measure)
Review topic	Author	Year	Title	Journal	Volume	Issue	Pages	Abstract	Aim as stated	Study design	Setting/data source	Recruitment method	Inclusion	Type of intervention(s)	Summarise the study: provide context for data entry	Total No PFA (N)	Toes (n)	MTP (n)	TMA (n)	Lisfranc - Tarsometatarsal (n)	Chopart - transtarsal (n)	Ray (n)	Other (n)	Cause of amputation	Percent w/ diabetes (%)	Sex (% male)	Age (Mean ±SD years)	Comorbidities reported	Sociodemographic details	Total No TTA (N)	Cause of amputation	Percent w/ diabetes (%)	Sex (% male)	Age (Mean ±SD years)	Comorbidities reported	Sociodemographic details	Measure(s)	How was the outcome measure determined?	PFA	TTA	Difference	Sig	Result summary (take home message)
Wound healing and complications
Wound healing and complications	Andrews, K. L., M. Y. Dib, T. C. Shives, T. L. Hoskin, D. A. Liedl and A. J. Boon	2013	Noninvasive Arterial Studies Including Transcutaneous Oxygen Pressure Measurements with the Limbs Elevated or Dependent to Predict Healing After Partial Foot Amputation						The objective of the current study was to assess the use of noninvasive arterial studies including TcPO2 to predict healing, to determine whether the use of physiologic maneuvers (elevation and dependency) could improve the utility of TcPO2 measurements in predicting healing, and to determine whether demographic factors significantly improve the prediction of healing for patients who underwent pa…	Cohort - Retrospective	USA, tertiary care facility.	Convenience	Patients who underwent partial foot amputation after noninvasive vascular studies between the years 1992 and 2007 if they authorized a review of their medical records. Patients who had noninvasive arterial studies, did not have revascularization (surgical or endovascular) at the same time as amputation, did not have revascularization between their noninvasive arterial studies and amputation, had …	Noninvasive arterial studies completed prior to amputation	A retrospective cohort with various levels of partial foot amputation. Various noninvasive arterial studies had been performed prior to amputation; some performed only on a portion on the sample. For our purposes, wound healing was reported as healing within 3 months, healing in 3-12 months, or non-healing.	307	172		47			81	7 ('combined' - not defined)	Not reported	79	70	65.5±14.8	hypertension, smoking status, presence of diabetes, HbA1c, ABI,	age, sex,								Healed within 3 months or between 3-12 months	Counts and percentages	61% healed within 3 months; 9% healed in 3-12 months; (so 1 year healed rate was 70% including those healed within 3 months as well as those that healed between 3-12 months)				61% healed 3 months, 70% at 1 year
Wound healing and complications	Evans, K. K., C. E. Attinger, A. Al-Attar, C. Salgado, C. K. Chu, S. Mardini and R. Neville	2011	The importance of limb preservation in the diabetic population	Journal of Diabetes & its Complications	25	4	227-231	OBJECTIVE: Limb salvage in the diabetic population is complex, controversial, costly and variable throughout the world. Within the diabetic population, the indications and morbidity surrounding major leg amputation have not been well defined. RESEARCH DESIGN AND METHODS: A retrospective study of the Georgetown Limb Salvage Registry was conducted to determine outcomes in diabetic patients undergoi…	The purpose of this study was to assess our multidisciplinary approach to limb salvage by (1) analyzing the limb salvage rate of the patients requiring either transmetatarsal (TMA), Chopart or Lisfranc amputation for closure and (2) comparing and contrasting these populations to determine risk factors and indications for major leg amputation.	Cohort - Retrospective	USA, University Medical Centre Washington DC/ Georgetown Limb Salvage Register/ limb centre and hospital chart records to demographic, etiology, other confitions.	Convenience	Included on limb salvage register between 1990-1999, ambulatory patient with limb threatening foot pathology, forefoot/midfoot breakdown requiring treatment with transmetatarsal amputation, Lisfranc or Chopart amputation (or higher). Patients who were bedridden or non-ambulatory were excluded as were those who did not go on to amputation or had incomplete records (n=16 of 129 people that met the …	Usual care	Retrospective review of charts for people with different levels of partial foot and transtibial amputation. While the aim was to compare limb salvage rates with three levels of partial foot amputation AND to compare these populations for risk factors, the study really focuses on comparing the partial foot cohort (all levels combined) with a transtibial cohort. Numerous paired comparisons of demog…	88			58	17	13			DM	100	0.57	70 (no SD reported)	Diabetes, neuropathy, coronary arterial disease, Hypertension, peripheral vascular disease, chronic renal failure, contralateral amputation, Charcot collapse	Age, sex	25	DM	1	0.76	69 (no SD reported)	Diabetes, neuropathy, coronary arterial disease, Hypertension, peripheral vascular disease, chronic renal failure, contralateral amputation, Charcot collapse	Age, sex	1 year - healed	Simple count of number healed, with percentages of wound failure results	86% limbs healed at 1-year. Perioperative complications rate of 42% including" 22% dehiscence; 8% revision to more proximal PFA; 14% revised to TTA.	TTA group: complications occurred in 28% (7/25) including: 8% dehiscence; 4% infection and 12% (3/25) local revision. No proportion healed reported.			86% of PFA healed at 1 year. Data for TTA not reported clearly: if all patients in BKA group were healed in 49 days, then that might mean 100% healed at 1 year.
Wound healing and complications	Lakstein, D., Z. Feldbrin, L. Schorr and A. Lipkin	2014	Primary closure of elective toe amputations in the diabetic foot - is it safe?	Journal - American Podiatric Medical Association	104	4	383-386.	Background: Toe amputation is the most common partial foot amputation. Controversy exists regarding whether to primarily close toe amputations or to leave them open for secondary healing. The purpose of this study was to evaluate the results of closed toe amputations in diabetic patients, with respect to wound healing, complications, and the need for further higher level amputation. Methods: We r…	Evaluate the results of closed toe amputations in diabetic patients, with regard to wound healing, complications and the need for further higher level amputation.	Cohort - Retrospective	Israel, Specialist Diabetic Foot Ulcer service.	Convenience	Diabetic patients undergoing elective or semi-elective toe amputation due to necrosis or osteomyelitis. Patients who did not have proximal involvement requiring ray or transmetatarsal amputations; have abscesses or necrotizing fasciitis; have extensive cellulitis or tenosynovitis which meant that clean margins could not be achieved; need revascularization surgery; fail to complete follow-up until…	Primary closure of toe amputation	Retrospective cohort following 35 patients with 40 toe amputations, from surgery until complete healing or further surgery, including reamputation.	35	35							PVD and/or DM	100	66	66.6±10.2	Involved toe, histopathology, bacteriology, outcome	Age, sex								Percentage healed at 3 weeks	Counts and percentages	75% healed within 3 weeks. (Treated as 30 of 40 amputations, not people). Can't determine the number of people from the original 35 that healed at 3 weeks.				With patients who were carefully selected, this service saw a low failure/high healing rate. Results were remarkably good: 75% healed completely in 3 weeks; 20% had delayed closure (no time point so can't include); 5% needed reamputation surgery at 4-weeks.
Wound healing and complications	Stone, PA; Back, MR; Armstrong, PA; et al.:	2005	Midfoot amputations expand limb salvage rates for diabetic foot infections.					The persistent high incidence of limb loss resulting from advanced forefoot tissue loss and infection in diabetic patients prompted an evaluation of transmetatarsal (TMA) and transtarsal/midfoot amputations in achieving foot salvage at our tertiary vascular practice. Over the last 8 years, 74 diabetic patients required 77 TMAs for tissue loss and/or infection. Twelve (16%) of the patients had a c…	We report our recent experience with transtarsal amputation to salvage nonhealing transmetatarsal amputations in diabetic patients.	Cohort - Retrospective	USA, FL Veterans hospital.	Not clear	Not clear	Usual care	Study very difficult to follow. Suggest a retrospective review of records from 74 people with an index transmetatarsal amputation. Outcomes related to healing and mortality reported at different time points.	74			74					PVD and/or DM	100	86.5	64 (No SD, range 45-8)	Tobacco use,hyperlipidemia, end-stage renal disease, contralateral major amputation ('major' not operationally defined);	Age, sex								Healed at 3 months after partial foot amputation	Counts and percentages	TMA healed at 3 months: 43% TMA failing at 3 months: 53%				43% TMA healed at 3 months

## Sheet: 2. Ipsilateral reamputation
									Study overview							Participants - PFA														Participants - TTA							Outcome (repeat blocks of rows as necessary for each outcome measure)
Review topic	Author	Year	Title	Journal	Volume	Issue	Pages	Abstract	Aim as stated	Study design	Setting/data source	Recruitment method	Inclusion	Type of intervention(s)	Summarise the study: provide context for data entry	Total No PFA (N)	Toes (n)	MTP (n)	TMA (n)	Lisfranc - Tarsometatarsal (n)	Chopart - transtarsal (n)	Ray (n)	Other (n)	Cause of amputation	Percent w/ diabetes (%)	Sex (% male)	Age (Mean ±SD years)	Comorbidities reported	Sociodemographic details	Total No TTA (N)	Cause of amputation	Percent w/ diabetes (%)	Sex (% male)	Age (Mean ±SD years)	Comorbidities reported	Sociodemographic details	Measure(s)	How was the outcome measure determined?	PFA	TTA	Difference	Sig	Result summary (take home message)
Ipsilateral reamputation
Reamputation	Dillingham, T. R. and L. E. Pezzin	2008	Rehabilitation setting and associated mortality and medical stability among persons with amputations						The purpose of this study was to examine factors affecting discharge destination and to provide insights into the relationship between postacute rehabilitation setting and 12-month outcomes among elderly persons undergoing major lower-limb amputations secondary to peripheral vascular diseases.	Cohort - retrospective	USA, 5% Medicare claims 1996.	Random (irrespective of method of randomisation)	Dysvascular lower limb amputation in USA during 1996. Excluding toe amputations, trauma and tumor causes. Medicare beneficiary.	Usual care	Based on random sample of 5% of USA Medicare beneficiaries with dysvascular lower limb amputation in 1996. Retrospective review of data looking at (dependent variables) 12 month mortality, probability of reamputation, prosthetic prescription, subsequent hospital admissions stratified by discharge destination; (independent variables) home, rehabilitation or skilled nursing facility. Outcomes for '…	379								PVD and/or DM	Given aim of study, demographic and social factors reported for whole lower limb amputee sample or by discharge destination. Therefore, can only make inferences about partial foot/transtibial samples based on entire lower limb amputation sample. 70% lower limb amputation sample had DM.	Given aim of study, demographic and social factors reported for whole lower limb amputee sample or by discharge destination. Therefore, can only make inferences about partial foot/transtibial samples based on entire lower limb amputee sample. 49% males.	Given aim of study, demographic and social factors reported for whole lower limb amputee sample or by discharge destination. Therefore, can only make inferences about partial foot/transtibial samples based on entire lower limb amputee sample. Age reported in three categories, most people in 65-74 (31%) or 75-84 (32%) year age groups.	Number of comorbidities based on comprehensive list including, as illustrative examples: renal disease, tumors, myocardial infarc, congestive heart failure, DM, HT, peotic ulcers, depression, alcohol use… etc…(bottom column 1, pg 1040);	Geographic region, race, age, sex, index amputation level,	949		Given aim of study, demographic and social factors reported for whole lower limb amputation sample or by discharge destination. Therefore, can only make inferences about PFA/TTA samples based on entire lower limb amputation sample. 70% of lower limb amputation sample had DM.	Given aim of study, demographic and social factors reported for whole lower limb amputation sample or by discharge destination. Therefore, can only make inferences about PFA/TTA samples based on entire lower limb amputation sample. 49% males - low.	Given aim of study, demographic and social factors reported for whole lower limb amputation sample or by discharge destination. Therefore, can only make inferences about PFA/TTA samples based on entire lower limb amputation sample. Age reported in three categories, most people in 65-74 (31%) or 75-84 (32%) year age groups.	Race, number of comorbidities (based on comhrehensive list - renal disease, tumors, myocardial infarc, congestive heart failure, DM, HT, peotic ulcers, depression, alcohol use… etc…(bottom column 1, pg 1040);	Geographic region, race, age, sex, index amputation level	One-year any reamputation (%)	Counts and precentages	Number of reamputations at 1 year by discharge destination: Rehab (5%) Skilled nursing facility (42%) Home (39%)	Number of reamputations at 1 year by discharge destination: Rehab (24%) Skilled nursing facility (21%) Home (24%)		Aim not designed to compare PFA and TTA groups	People with PFA who were discharged to rehab had a lower rate of reamputation than those discharged to skilled nursing facilities or to home.
Reamputation	Dillingham, T. R., L. E. Pezzin and A. D. Shore	2005	Reamputation, mortality, and health care costs among persons with dysvascular lower-limb amputations						The purpose of this study was to examine 12-month reamputation and mortality rates among a large cohort of persons with dysvascular amputations. Reamputation and mortality rates as well as costs associated with medical treatment of dysvascular amputees, by amputation level and presence or absence of diabetes, were examined by using data from a nationally representative sample of Medicare benefici…	Cohort - Retrospective	USA, population study of Medicare beneficiaries.	Random (irrespective of method of randomisation)	Dysvascular, lower limb amputation only, amputation in 1996.	Usual care	Given the aim of the study, sociodemographic data have only been reported for the overall group as well as subgroups with diabetes and without. No sociodemograhpic data by level of amputation. The available sociodemographic data does allow some assessment of the population (e.g., typical-to-older amputee group, age distribution, etc.) Data is available, by level of amputation, for percentage mort…	1451	1072						379 (defined as 'foot & ankle, but not Symes)	PVD and/or DM	Reported for whole lower limb amputee sample or by discharge destination. Therefore, can only make inferences about partial foot and transtibial subjects based on entire lower limb amputee sample. 83% diabetes	Reported for whole lower limb amputee sample or by discharge destination. Therefore, can only make inferences about partial foot and transtibial subjects based on entire lower limb amputee sample. 52% males	Reported for whole lower limb amputee sample or by discharge destination. Therefore, can only make inferences about partial foot and transtibial subjects based on entire lower limb amputee sample: mean age 73.7 years. No SD reported.	Number comorbidities, age at first amputation, Age at death, Number admissions within 12 months post index amputation, Number of amputations related admissions 12 months post index amputation	Race, age, sex.	950	PVD	0.79	Not reported for PFA/TTA cohorts, but overall lower limb amputation sample was 52% male	Not reported for PFA/TTA cohorts, but for overall lower limb amputation sample mean age was 73.7 years. No SD reported.	Number comorbidities, age at first amputation, Age at death, Number admissions within 12 months post index amputation, Number of amputations related admissions 12 months post index amputation	Race, age, sex	1 year - Reamputation rate after index amputation (%)	Counts and percentages	Whole sample Toe (34.9%: one reamputation: 24%, two or more reamputations: 10.9%) Foot and/or ankle (38.8%; one reamputation: 28.8%, two or more reamputations: 10.0%) Diabetics Toe (37.4%: one reamputation: 25.3%, two or more reamputations: 12.2%) Foot and/or ankle (40.1%; one reamputation: 29.0%, two or more reamputations: 11.1%) Non-diabetics Toe (23%: one reamputation: 17.5%, two or more reamp…	Whole sample Transtibial (33.0%; one reamputation: 19.7%, two or more reamputations: 3.3%) Diabetics Transtibial (24.6%; one reamputation: 20.6%, two or more reamputations: 4.0%) Non-diabetics Transtibial (16.7%; one reamputation: 16.2%, two or more reamputations: 0.5%)	Whole sample Toe vs TTA (1.9%: one reamp: 4.3%, two or more reamp:7.6%) Foot and/or ankle vs TTA (5.8%: one reamp: 8.9%, two or more reamp: 6.6%) Diabetics Toe vs TTA (12.8% one reamp 5.3%, two or more reamp:8.2%) Foot and/or ankle vs TTA (24.5% one reamp 9.3%, two or more reamp:7.1%) Non-diabetics Toe vs TTA (6.3% one reamp 1.3%, two or more reamp:5.0%) Foot and/or ankle vs TTA (15.6% one reamp …	Not reported	Rates of reamputation as 12 months were higher for those with an index partial foot compared to a transtibial. About 40% of diabetics with partial foot amputation progressed to higher amputation compared to just 25% of diabetics with an initial transtibial amputation. About 25% of non-diabetics with an index partial foot amputation progressed to higher amputation compared to 16% of index transtib…
Reamputation	Glaser, J. D., R. P. Bensley, R. Hurks, S. Dahlberg, A. D. Hamdan, M. C. Wyers, E. L. Chaikof and M. L. Schermerhorn	2013	Fate of the contralateral limb after lower extremity amputation						To further investigate factors that may lead to contralateral amputations.	Cohort - retrospective	US, Boston, Chart review.	Convenience	Primary admission diagnosis code (ICD9) was related to nonhealing wounds with or without peripheral arterial disease or ischemic rest pain. Lower extremity ampuation at any level (84.10-84.19) between 1998-2010 at single institution.	Usual care	Retrospective chart review of patients admitted for minor (toe or transmetatarsal amputation) or major (through ankle or more proximal) due to non-healing wounds. Primary outcomes related to major amputation; secondary outcomes include ipsilateral reamputation, contralateral reamputation and mortality. Estimates generated from Kaplan-Meier estimates.	1140	Not reported		Not reported				Only toe and transmetatarsal amputations, but no number by level of 'minor' amputation	PVD and/or DM	73.6	67.3	66.6±13.5	Diabetic, chronic renal failure, end-stage renal disease, hypertension	Age, sex, non-white race								Ipsilateral reamputation 1 and 5 years	Counts and percentages	Initial minor (toe/TMA) – to - ipsilateral minor 1 year: 14.2% 5 year: 19.9% Initial minor (toe/TMA) – to - ipsilateral major 1 years: 10.5% 5 years: 14.2%
Reamputation	Izumi, Y., K. Satterfield, S. Lee and L. B. Harkless	2006	Risk of reamputation in diabetic patients stratified by limb and level of amputation: a 10-year observation						In this retrospective cohort study, we aimed to (1) illustrate the difference between the reamputation risk for ipsilateral and contralateral limbs and (2) stratify the risk of reamputation by the original level of amputation.	Cohort - retrospective	USA, Texas, university hospital	Convenience	Patients with lower extremity amputation defined as surgical removal of bones by transection at any level, which were not autoamputations or resections of partial bone with the distal end intact. Patients were all diabetics who had no history of traumatic amputation, no prior lower extremity amputation, with complete records of their history of lower extremity amputation and follow up of at least…	Not reported	A retrospective cohort study where there were cohorts with toe, ray, midfoot (transmetatarsal, Chopart, Lisfranc) or major (Syme, transtibial, transfemoral, hip disarticulation) amputations. Data are presented for the 3 discrete groups of partial foot amputation. Results indicate statistically lower cumulative rates of ipsilateral reamputation in all partial foot cohorts compared to the major amp…	213	61					114	38 - "midfoot" - includes transmetatarsal, Chopart, Lisfranc	DM/PVD	100	Toe: 60.7%, Ray: 71.1%, Midfoot: 81.6%	Toe: 53.3±10.9 Ray: 52.4±10.5 Midfoot: 51.7±9.5	Peripheral arterial disease, end-stage renal disease, L/R bypass surgery	Gender, ethnicity, smoking status								Cumulative ipsilateral reamputation rates at 1, 3, 5 years for level of partial foot amputation	Counts and percentages	Values for each rate at 1, 3, and 5 years were as follows: toe: 22.8, 39.6, and 52.3%; ray: 28.7, 41.2, and 50%; midfoot: 18.8, 33.3, and 42.9%.				Best gleaned from fig 1,2,3. For all levels of PFA, cumlative rates of ispilateral reamputation were around 25% at 1 year. By 3 years, this was close to 40 % and by 5 years the figure had increased to about 45%. Lower rates were seen in the midfoot cohort compared to teh other PFA cohorts at all time points. suggest these are weighted by Nos to greate a PFA group. When weighted to reflect the dif…
Reamputation	Kono, Y. and R. R. Muder	2012	Identifying the incidence of and risk factors for reamputation among patients who underwent foot amputation						We aimed to (1) identify the incidence of and risk factors for ipsilateral reamputation after forefoot amputation; (2) evaluate whether postoperative infections increases the risk of reamputation; and (3) evaluate whether the risk of reamputation was reduced by the duration of antimicrobial therapy after amputation.	Cohort - Retrospective	USA, VA Pittsburg.	Convenience	Non-traumatic, foot amputation (both cause and amputation level not operationally defined). Foot amputation in VA hospital Pittsburg between Jan 2002 and Dec 2004 (presume beginning and end of year given no dates specified).	Usual care	Retrospective review of people with non-traumatic, foot amputation (both cause and amputation level not defined) but appear to be forefoot (see aims) or forefoot and hindfoot (see caption Table 1). A wide range of factors thought to affect ipsilateral reamputation and mortality rates were recorded as part of data extraction. Study didn't report incidence of reamputation but rather a percentage of…	116							Amputation level not operationally defined (Table 1 caption suggests a mix of hindfoot, midfoot, metatarsal and toe amputations); Table 1 suggests that the cohort with reamputation included a subcohort with hindfoot and midfoot amputation, while the cohort without reamputation only included people with transmetatarsal/toe amputations.	Unclear	0.802	0.991	66.8±11.0	Urgency of surgery, site of amputation, operation time, wound closure, hospitalization day, current smoking, Type 2 diabetes, diabetic neuropathy, end-stage renal disease, history coronary arterial disease, immuniosuppresent used, history contralateral/ipsilateral amputatuion, history of revascularisation, physical exam, lab tests, malnutrition, ABI, imaging studies, cultures, use of antibiotics …	Age, sex								Ipsilateral reamputation at 6 months and 3 year	Counts and percentages	38.8% of sample had ipsilateral reamputation in 6 months after index amputation. At three years, that number increasd to 49.1% of sample. (NB: the paper says 78.9% received reamputation with 6 months of first amputation - this statistic is reported in a misleading way in the article). Of the 116 people in the sample, 57 people (49.1% of the sample) went on to have ipsilateral reamputation within …				Aside: of the 57/116 (49%) that had reamputation at 3 years: 42 had one reamputation, 14 needed 2 reamputations, one had 3 reamputations. 15 progressed from toe to TMA, 24 patients progressed to TTA and 8 progressted to TFA (no initial level reported for those who progressed to TTA and TFA.
Reamputation	Lakstein, D., Z. Feldbrin, L. Schorr and A. Lipkin	2014	Primary closure of elective toe amputations in the diabetic foot - is it safe?						Evaluate the results of closed toe amputations in diabetic patients, with regard to wound healing, complications and the need for further higher level amputation.	Cohort - retrospective	Israel, specialist Diabetic Foot Ulcer clinic.	Convenience	Diabetic patients undergoing elective or semi-elective toe amputation due to necrosis or osteomyelitis. Patients who did not have proximal involvement requiring ray or transmetatarsal amputations; have abscesses or necrotizing fasciitis; have extensive cellulitis or tenosynovitis which meant that clean margins could not be achieved; need revascularization surgery; fail to complete follow-up until…	Primary closure of toe amputation	Retrospective cohort following 35 patients with 40 toe amputations, from surgery until complete healing or further surgery, including reamputation.	35	35							PVD and/or DM	100	66	66.6±10.2	Involved toe, histopathology, bacteriology, outcome	Age, sex								Number of cases that proceeded to reamputation at 4-weeks post index toe amputation; the 2 cases reported were both within 4 weeks of initial surgery.	Proportion of cases	4 week: 2 cases, 5.7%				With patients who were carefully selected, this service saw a low proportion reamputated reampution rate. Results were remarkably good: 75% healed completely in 3 weeks; 20% had delayed closure (no time point so can't include); 5% needed reamputation surgery at 4-weeks.
Reamputation	Younger, A. S. E., M. A. Awwad, T. P. Kalla and G. de Vries	2009	Risk factors for failure of transmetatarsal amputation in diabetic patients: a cohort study						The objective of this study therefore was to determine the factors affecting the outcome (conversion to transtibial amputation) of patients undergoing transmetatarsal amputation.	Case control	Canada, type of service not specified.	Unable to determine	Patients with a diabetic foot complication amenable to transmetatarsal amputation; patients with a 5th ray or toe amputation being converted to transmetatarsal amputation; able to converse with study coodinators; able to follow up at clinic until healing; not undergoing isolated ray amputations or calcanectomies; surgery not above the level of the metatarsals; patients without skin necrosis which…	Usual care	It appears that 68 people were followed. Of these, 21 people went on to have a transtibial amputation, forming the case group. This cohort was age- and sex-matched to a control group (n=21). There is no further mention of the remaining 26 people. The purpose of the study was to determine risk factors for failure of transmetatarsal amputation. As such, 22 risk factors which were recorded preoperat…	21			21					PVD and/or DM	100	81	60.4±11.8	Renal impairment, type of diabetes, smoking status, duration of diabetes, hemoglobin levels, HbA1c levels,	Age, sex	21	PVD and/or DM	1	0.81	56.3±10.9	Renal impairment, type of diabetes, smoking status, duration of diabetes, hemoglobin levels, HbA1c levels,	Age, sex	1-year ipsilateral reamputation	Counts and percentages	31% (21 of 68) TMAs had ipsilateral reamputation at 12 months			HbA1c: successful TMA cohort: 0.078±0.018 (n=6) Failed TMA cohort: 0.106±0.024 (n=6), p<0.001. Number of people who had debridement following initial TMA: Successful TMA cohort: 1 (n=21); Failed TMA cohort: 6 (n=21), p<0.05).	People who had debridement following initial transmetatarsal amputation were more likely to have revision surgery.

## Sheet: 3. Quality of life
									Study overview							Participants - PFA														Participants - TTA							Outcome (repeat blocks of rows as necessary for each outcome measure)
Review topic	Author	Year	Title	Journal	Volume	Issue	Pages	Abstract	Aim as stated	Study design	Setting/data source	Recruitment method	Inclusion	Type of intervention(s)	Summarise the study: provide context for data entry	Total No PFA (N)	Toes (n)	MTP (n)	TMA (n)	Lisfranc - Tarsometatarsal (n)	Chopart - transtarsal (n)	Ray (n)	Other (n)	Cause of amputation	Percent w/ diabetes (%)	Sex (% male)	Age (Mean ±SD years)	Comorbidities reported	Sociodemographic details	Total No TTA (N)	Cause of amputation	Percent w/ diabetes (%)	Sex (% male)	Age (Mean ±SD years)	Comorbidities reported	Sociodemographic details	Measure(s)	How was the outcome measure determined?	PFA	TTA	Difference	Sig	Result summary (take home message)
Quality of life
Quality of life	Boutoille, D. Féraille, A. Maulaz, D. Krempf, M.	2008	Quality of life with diabetes-associated foot complications: comparison between lower-limb amputation and chronic foot ulceration						The aim of this study was to get a better comprehension of the influence of amputation on physical and social aspects of our patients’ quality of life.	Case control	France, Centre Hospitalier Universitaire (inpatients and outpatients).	Convenience	Group 1: patients hospitalized between early 2002 and early 2004 in "our departments" who underwent an amputation for a diabetic foot ulcer, at least 1 year before the beginning of the study. Group 2: outpatients experiencing regular visits for a current foot ulcer, with no previous history of amputation.	Group 1: no description of treatment. Group 2: actively and regularly followed in outpatient clinic.	Study compared subjects with transtibial amputation to a foot ulcer group and subjects with transmetatarsal or toe amputations to the foot ulcer group. The transtibial and partial foot amputee subjects weren't compared directly. SF-36 subscale scores reported separately for transtibial and partial foot groups but demographics were only provided for amputee group as a whole.	19 (combined transmetatarsal and toe amputations)	Not reported		Not reported					PVD and/or DM	100	Not reported	68 (median), for all amputees; not reported by partial foot amputation cohort/level.	Duration of diabetes, HbA1C levels, BMI, neuroischemic ulcer present	Age	6	DM	1		68 (median) for all amputees; not reported for transtibial amputee cohort	Duration of diabetes, HbA1C levels, BMI, neuroischemic ulcer present	Age	Medical Outcome Study Short Form 36 (MOS SF-36)		Physical functioning 55 ± 29 Role-physical 58 ± 39 Bodily pain 75 ± 26 General health 39 ± 18 Vitality 46 ± 20 Social functioning 69 ± 26 Role emotional 61 ± 46 Mental health 61 ± 19	Physical functioning 35 ± 39 Role-physical 33 ± 34 Bodily pain 84 ± 20 General health 54 ± 20 Vitality 55 ± 22 Social functioning 62 ± 25 Role emotional 33 ± 42 Mental health 65 ± 21		Not reported given aim didn’t compare partial foot and transtibial cohorts.	Given that only descriptive data are reported for the TTA and PFA subjects, readers must make their own assessment about quality of life between amputee groups. Descriptive data suggest quality of life is similar between groups, albeit with large variability in the subscale scores and small groups.
Quality of life	Peters, E.J.G., Childs, M.R., Wunderlich, R.P., Harkless, L.B., et al.	2001	Functional status of persons with diabetes-related lower-extremity amputations						The objective of this study was to evaluate amputations among diabetic patients and to determine the functional level of these patients with the Sickness Impact Profile (SIP).	Case control	Not reported	Convenience	Group 1: patients with diabetes who had undergone amputation. Group 2: control subjects with diabetes who had not undergone amputation.	Usual care	Study compared subjects with amputation to subjects without and provided a subgroup analysis comparing mid level amputations (toe, transmetatarsal, Lisfranc, and Chopart amputations) to high-level amputations (defined as both transtibial and transfemoral amputations).	26	Not reported		Not reported	Not reported	Not reported			PVD and/or DM	100	77.1% all amputees, not reported by partial foot level.	56.8±9.9 years for all amputees, not reported by partial foot level.	By all lower extremity amputees: duration of diabetes, HbA1C levels, BMI, coronary artery disease, missing pulse	Age, sex	8 transtibial amputees (grouped together with 1 transfemoral amputee and reported as the high level amputee group)	PVD and/or DM	1	77.1% all amputees, not reported by partial foot amputation level	56.8±9.9 years for all amputees, not reporetd by partial foot amputation level	By all lower extremity amputees: duration of diabetes, HbA1C levels, BMI, coronary artery disease, missing pulse	Age, sex	Sickness Impact Profile (SIP)		Psychosocial dimension 15.1 ± 9.1 Physical dimension 31.0 ± 14.7 Total score SIP 26.6 ± 10.3	Psychosocial dimension 14.0 ± 8.5 Physical dimension 40.6 ± 13.9 Total score SIP 30.5 ± 8.9		ANOVA comparing all 3 groups (mid-level, high-level amputation and no amputation): Psychosocial dimension p=0.945; Physical dimension p=0.001; Total score SIP p=0.029. This study seems to have used multiple ANOVAs for the SIP scores against amputation level. They have also used multiple Chi-squared tests to report statistical significance for many variables, but it's unclear how the data has been…	Data were provided for mid and high level amputation groups. While the number of PFA were clearly identified, the number of TTA were not. We sought clarification from the authors, who reported that there were 8 TTA and 1 TFA. Since we were unable to tease out the data for TTAs uniquely, the aggregate results for the high level data are included in the review as data for TTA given that a single TF…
Quality of life	Quigley, Matthew Dillon, Michael P Duke, Emily J	2015	Comparison of quality of life in people with partial foot and transtibial amputation: A pilot study						To compare quality of life in people with partial foot and transtibial amputation secondary to peripheral vascular disease and determine factors influencing quality of life in these cohorts.	Cross sectional	Australia, Large metropolitan hospital in Melbourne.	Convenience	Adults over 18 years of age, amputation due to peripheral vasular disease, either a unilateral transtibial amputation or partial foot amputation, and minimum 6 months post-amputation.	Usual care	Study compared quality of life in subjects with partial foot and transtibial amputation using a mail-in survey. Partial foot amputation levels described somewhat vaguely as fore and mid foot. Mean SF-36 Mental Health and Physical Component Scores provided in figure but not directly stated.	10							5 "forefoot" and 4 "midfoot"	PVD and/or DM	80	70	63±10	Duration of diabetes, presence of tissue breakdown, retinopathy, nephropathy, neuropathy	Age, sex	23	PVD and/or DM	0.7	0.6	68±10	Duration of diabetes, presence of tissue breakdown, retinopathy, nephropathy, neuropathy	Age, sex	(1) revised demographic information page from the Trinity Amputation and Prosthesis Experience Scales–Revised (TAPES-R) and (2) the SF-36v2 Health Survey. Results from the SF-36v2 are reported using a physical component summary (PCS) and a mental health component summary (MCS).		Mean SF-36 Mental Health Component and Physical Component summary scores only reported in Figure 1. Data provided in response to author request for clarification for partial foot amputees: PCS: 37.53±10.50; MCS: 48.78±12.72.	Mean MCS and PCS not stated but shown in Figure 1. Data provided in response to author request for clarification for transtibial amputees: PCS: 36.32±11.96; MCS: 52.33±10.78.		No significant differences in the PCS and MCS scores between partial foot and transtibial amputee groups. The only independent variables that contributed significantly to the PCS were time with diabetes and age. Only the presence of retinopathy contributed significantly to the MCS.	There was no significant difference in either the Physical or Mental Health Component scores between groups with partial foot or transtibial amputation, therefore quality of life was comparable in cohorts with partial foot and transtibial amputation. Of particular interest to our review, level of amputation was not a significant contributor to quality of life.

## Sheet: 4. Functional ability
									Study overview							Participants - PFA														Participants - TTA							Outcome (repeat blocks of rows as necessary for each outcome measure)
Review topic	Author	Year	Title	Journal	Volume	Issue	Pages	Abstract	Aim as stated	Study design	Setting/data source	Recruitment method	Inclusion	Type of intervention(s)	Summarise the study: provide context for data entry	Total No PFA (N)	Toes (n)	MTP (n)	TMA (n)	Lisfranc - Tarsometatarsal (n)	Chopart - transtarsal (n)	Ray (n)	Other (n)	Cause of amputation	Percent w/ diabetes (%)	Sex (% male)	Age (Mean ±SD years)	Comorbidities reported	Sociodemographic details	Total No TTA (N)	Cause of amputation	Percent w/ diabetes (%)	Sex (% male)	Age (Mean ±SD years)	Comorbidities reported	Sociodemographic details	Measure(s)	How was the outcome measure determined?	PFA	TTA	Difference	Sig	Result summary (take home message)
Functional ability
Function	Marzen-Groller, K. D., Tremblay, S. M., Kaszuba, J. Girodo, V. Swavely, D. Moyer, B. Bartman, K. Carraher, W. Wilson, E.	2008	Testing the effectiveness of the Amputee Mobility Protocol: A pilot study	Journal of Vascular Nursing	26	3	74-81	We studied prolonged length of stay (LOS) in the acute care setting on a medical-surgical vascular unit, related to loss of functional mobility status after lower extremity amputation, and implementation of the Amputee Mobility Protocol (AMP) as a standard of care for all patients pre- and post-lower extremity amputation who were admitted to the medical-surgical vascular unit. A comparative pre-p…	The aim of this study was to examine the impact of the Amputee Mobility Protocol (not amputee mobility predictor) on patients’ functional mobility and length of stay.	Cohort	USA, Community hospital, medical-surgical vascular unit.	Convenience	Adults (age not reported) who had transmetatartsal, transtibial or transfemoral amputation on the medical-surgical vascular unit.	New rehabilitation protocol known as the Amputee Mobility Protocol (not to be confused with amputee mobility predictor).	Assessment of length of stay and functional mobility before and after introduction of a new rehabilitation protocol. Descrpitive data for a modified Functional Index Measure (FIM) reported for two independent groups: transmetatarsal and transtibial groups (i.e., people with transmetatarsal or transtibial amputation in the old rehab program, and people with transmetatarsal and transtibial amputati…	13: Two independent samples; pre new rehab program (n=7); post new rehab program (n=6).			13					Not reported	Not reported	Not reported	Not reported	Not reported	Not reported	Total: 19. Pre new rehabilitation program (n=14); post new rehabilitation program (n=5).	Not reported	Not reported	Not reported	Not reported	Not reported	Not reported	Not reported	Modified FIM included: supine to sit, sit to supine transfers, stand and pivot out of bed transfers, sliding board transfers, sit to stand, stand to sit transfers, and ambulation distance. (These 'functional outcomes' have a very narrow, low-level, focus).	Pre introduction of new rehab protocol Stand to pivot 5 Sit to stand 3 Ambulation 25ft Post introduction of new rehab protocol Stand to pivot 6 Sit to stand 4 Ambulation 102ft	Pre introduction of new rehab protocol Stand to pivot 4 Sit to stand 2 Ambulation 4.7ft Post introduction of new rehab protocol Stand to pivot 6 Sit to stand 4 Ambulation Not reported	Pre introduction of new rehab protocol Stand to pivot 1 Sit to stand 1 Ambulation 20ft Post introduction of new rehab protocol Stand to pivot 0 Sit to stand 0 Ambulation NR	Not reported	The available descriptive data suggest that prior to implementation of the new rehab program, people with transmetatarsal amputation performed 1 category better on the modified FIM than their transtibial peers. By way of context, people with transmetatarsal amputation could perform the sit-to-stand (FIM score = 4) with 'minimal assistance' (i.e., patient expends more than 75% effort). In comparis…
Function	Peters, E.J.G., Childs, M.R., Wunderlich, R.P., Harkless, L.B., et al.	2001	Functional status of persons with diabetes-related lower-extremity amputations	Diabetes Care	24	10	1799-1804	OBJECTIVE— It is reasonable to predict that diabetes-related lower-extremity amputations have a detrimental impact on quality of life. However, we are unaware of any study in the medical literature describing the functional level of diabetic patients with amputations. The objective of this study was to evaluate amputations among diabetic patients and to determine the functional level of these pat…	The objective of this study was to evaluate amputations among patients with diabetes and to determine the functional status of patients with diabetes who had undergone amputation of the lower-extremity.	Case control	USA, one university hospital.	Convenience	Diabetes	Usual care	This study used the Sickness Impact Profile (SIP) to measure function and quality of life in a case-control study of people with diabetes and "midlevel" amputations (partial foot) or with "high level amputations" (transtibial/transfemoral), against a control group with diabetes and no history of amputation.	26	Not reported		Not reported	Not reported	Not reported			PVD and/or DM	1	77.1% all amputees, not reported by partial foot level.	56.8±9.9 years for all amputees, not reported by partial foot level.	By all lower extremity amputees: duration of diabetes, HbA1C levels, BMI, coronary artery disease, missing pulse	Age, sex	Mixed transtibial and transfemoral amputee cohort; therefore, only results from partial foot amputation cohort are able to be used							Sickness Impact Profile (SIP)		Psychosocial dimension: Case (PFA): 15.1±9.1 Control: 15.2±10.0. Physical dimension: Case (PFA):31.0±14.7, Control: 22.3±14.7. Total SIP: Case (PFA): 26.6±10.3, Control: 22.5±10.3.			Main effects: Psychosocial dimension: p=0.945; Physical dimension: p=<0.001; Total SIP: p=0.029. Physical function significantly better in no amputation vs midlevel (p=0.019) and no amputation vs high level (p=.001). No other post-hoc results reported with p-values.	No statistically significant differences in psychosocial dimension of SIP score between any of the three groups.

## Sheet: 5. Mobility
									Study overview							Participants - PFA														Participants - TTA							Outcome (repeat blocks of rows as necessary for each outcome measure)
Review topic	Author	Year	Title	Journal	Volume	Issue	Pages	Abstract	Aim as stated	Study design	Setting/data source	Recruitment method	Inclusion	Type of intervention(s)	Summarise the study: provide context for data entry	Total No PFA (N)	Toes (n)	MTP (n)	TMA (n)	Lisfranc - Tarsometatarsal (n)	Chopart - transtarsal (n)	Ray (n)	Other (n)	Cause of amputation	Percent w/ diabetes (%)	Sex (% male)	Age (Mean ±SD years)	Comorbidities reported	Sociodemographic details	Total No TTA (N)	Cause of amputation	Percent w/ diabetes (%)	Sex (% male)	Age (Mean ±SD years)	Comorbidities reported	Sociodemographic details	Measure(s)	How was the outcome measure determined?	PFA	TTA	Difference	Sig	Result summary (take home message)
Mobility
Mobility	Brown, M.L., Tang, W., Patel, A. & Baumhauer, J.F.	2012	Partial foot amputation in patients with diabetic foot ulcers						The purpose of this study was to examine morbidity, mortality, proximal ipsilateral reamputation, and functional outcome in diabetic patients with recalcitrant foot ulcers.	Cohort - Retrospective	USA, one institution - type of institution not reported.	Purposive	Inclusion & exclusion criteria not explicitly stated. The data appears to be from all patients who underwent transtibial, transmetatarsal, Chopart’s, and calcanectomy (partial or total) amputations for nonhealing lower-extremity ulceration secondary to diabetes mellitus.	Nil - Usual care	Retrospective review of data from one institution served by 3 orthopedic surgeons, to compare mortality, morbidity, proximal ipsilateral reamputation and functional outcome in people who had received one of 4 levels of partial foot or transtibial amputation as a result of non-healing foot ulcers. The data applicable to our study is the functional outcome data, as measured with the Volpicelli Ambu…	65			21		10		Partial calcenectomy: 18; Total calcenectomy: 16	PVD and/or DM	100	Not reported	Transmetatarsal: 53.8±12.8; Chopart: 56.8±12.6; Partial calcenectomy: 53.4±13.6; Total calcenectomy: 63.8±13.0	Number of participants undergoing renal dialysis	Age, ASA-PS score, HbA1C, BMI, renal dialysis	18	PVD and/or DM	1	Not reported	58.6±12.3	Not stated; appears to be within 5 years of index amputation	Number of participants undergoing renal dialysis	Age, ASA-PS score, HbA1C, BMI, renal dialysis	Volpicelli Ambulatory Scale reported as means with SD: probably should be reported as medians as the data is ordinal	TMA: 4.3 ± 2.1; Chopart: 4.3 ± 2.9; partial calcanectomy: 4.3 ± 1.5; total calcanectomy: 3.3 ± 3.1	2.8 ± 2.4		Not reported	Mobility was better in all levels of PFA compared to TTA, but the risk of ipsilateral amputation was much higher, especially for Chopart and both partial and total calcanectomy.
Mobility	Czerniecki, J. M., A. P. Turner, R. M. Williams, K. N. Hakimi and D. C. Norvell	2012b	The effect of rehabilitation in a comprehensive inpatient rehabilitation unit on mobility outcome after dysvascular lower extremity amputation	Archives of Physical Medicine & Rehabilitation	93	8	1384-1391	OBJECTIVES: To (1) compare the total volume of rehabilitation therapy for patients ever attending a comprehensive inpatient rehabilitation unit (CIRU) versus never during the 12 months after amputation; (2) determine whether rehabilitation in a CIRU at any time in the first year after amputation results in greater mobility success compared with other types of rehabilitation environments of care; …	(1) to compare the total volume of rehabilitation therapy for patients ever receiving rehabilitation in a comprehensive inpatient rehabilitation unit (CIRU) versus never during the 12 months after amputation; (2) to determine whether the provision of rehabilitation in a CIRU at any time in the first year after amputation results in greater mobility success compared with other types of rehabilitat…	Cohort - Prospective	USA, 2 VA medical centres.	Unable to determine	Over 18 years, awaiting or underwent first major (transmetatarsal or higher) in last 6 weeks; primary cause of amputation diabetes melitus or peripheral vascular disease. Had adequate cognitive function and language to consent (<6 errors on Short Portable Mental Status Questionnaire), were ambulatory before amputation.	Nil - Usual care	People with transmetatarsal and transtibial amputation were included as part of a larger cohort, including people with transfemoral amputation, to explore the effect of rehabilitation in a comprehensive inpatient rehabilitation unit on mobility. The sample is a subsample of the participants in the Norvell et al. 2011 paper (p.2 - study design). For our purposes, this study reports on mobility as …	27			27					PVD and/or DM	Not reported for discrete groups based on amputation level. Lower extremity amputee cohort (CIRU 86%, No CIRU 86%).	Not reported: for discrete groups based on amputation level. Lower extremity amputee cohort was: CIRU (97% male), No CIRU (95% male)	Not reported for discrete groups based on amputation level. Lower extremity amputee cohort was: CIRU (60.8±6.9), No CIRU (65.7±8.4) years	Not reported: for discrete groups based on amputation level. Comorbidities reported for whole lower extremity sample included: Charlson Comorbidity Index, DM, Stroke, MCI, Dialysis, COPD, Arterial reconstruction, HT, Smoker, Alchol consumption score, Modified Social suppprt score, Major depressive disorder, Premorbid LCI-5	Not reported: for discrete groups based on amputation level. Variables reported for whole lower extremity sample included: Age, sex, BMI, relationship, race, employment, education level, residential status, economic status, precieved health,	39	PVD and/or DM	Not reported for discrete groups based on amputation level. Lower extremity amputee cohort was: CIRU: 86%, No CIRU: 86%	Not reported for discrete groups based on amputation level. Lower extremity amputee cohort was: CIRU: 97%, No CIRU: 95%	Not reported for discrete groups based on amputation level. Lower extremity amputee cohort was: CIRU: 60.8±6.9, No CIRU: 65.7±8.4 years	Not applicable: time series - measures at premodbid, surgery, 6 weeks, 4 months and 12 months post-surgery	Not reported for discrete groups based on amputation level. Comorbidities reported for whole lower extremity sample included: Charlson Comorbidity Index, DM, stroke, myocardial infarct, dialysis, COPD, arterial reconstruction, hypertension, smoker, alcohol consumption score, Modified Social Suppprt Score, major depressive disorder, premorbid LCI-5	Not reported for discrete groups based on amputation level. Variables reported for whole lower extremity sample included: age, sex, BMI, relationship, race, employment, education level, residential status, economic status, perceived health.	LCI-5 dichotomized and reported as percentage successfully returned to premorbid mobility	0.35	0.31	0.04	p=0.96, NS	There were no differences between TMA and TTA in the proportion of people that, at 12 months, had achieved their premorbid level of mobility. Factors influencing return to premorbid mobility included being treated in comprehensive inpatient rehab unit. Those with major depressive episodes and greater alochol use were less likely to be successful. Those with greater social support were more likely…
Mobility	Czerniecki, J. M., A. P. Turner, R. M. Williams, K. N. Hakimi and D. C. Norvell	2012a	Mobility Changes in Individuals With Dysvascular Amputation From the Presurgical Period to 12 Months Postamputation	Archives of Physical Medicine and Rehabilitation	93	10	1766-1773	Czerniecki JM, Turner AP, Williams RM, Hakimi KN, Norvell DC. Mobility changes in individuals with dysvascular amputation from the presurgical period to 12 months postamputation. Arch Phys Med Rehabil 2012;93:1766-73. Objectives: To describe changes in ambulation among individuals with lower-extremity amputation secondary to peripheral artery disease and/or diabetes prior to surgery through 12 mo…	Aim of the study was to: (1) describe the change in ambulatory function as a result of limb disability prior to amputation surgery among all participants and in a subset of patients enrolled presurgically, (2) describe the changes in ambulatory function over time from premorbid function to 12 months after amputation, and (3) identify the association between presurgical risk factors (including amp…	Cohort - Prospective	USA, 2 VA medical centres, 1 university hospital and a level 1 trauma centre.	Unable to determine	Over 18 years, awaiting or underwent first major (transmetatarsal or higher) in last 6 weeks; primary cause of amputation diabetes melitus or peripheral vascular disease. Had adequate cognitive function and language to consent (<6 errors on Short Portable Mental Status Questionnaire), were ambulatory before amputation.	Nil - Usual care	People with transmetatarsal and transtibial amputation were included as part of a larger cohort, including people with transfemoral amputation, to describe changes in mobility from presurgery to 12 months post surgery, to compare differences in mobility by amputation level, and to examine risk factors for change in mobility over time. For our purposes, this study reports on mobility as measured w…	27			27					PVD and/or DM	1	Not reported for discrete groups based on amputation level	63±7.8	Charlson Comorbidity Index, DM, Stroke, MCI, Dialysis, post traumatic stress, Arterial reconstruction, HT, Smoker, Alchol consumption score, Modified Social suppprt score, Treated for anxiety/depression, Premorbid LCI-5	Age, sex, BMI, relationship, race, employment, education level, residential status, economic status, precieved health,	52	PVD and/or DM	0.85	Not reported	61.5±9.1	Not applicable: time series - measures at premodbid, surgery, 6 weeks, 4 months and 12 months post-surgery	Charlson Comorbidity Index, DM, stroke, myocardial infarct, dialysis, post traumatic stress, arterial reconstruction, hypertension, smoker, alcohol consumption score, Modified Social Suppprt Score, treated for anxiety/depression, premorbid LCI-5	Age, sex, BMI, relationship, race, employment, education level, residential status, economic status, perceived health.	LCI-5	Not reported: no descriptive data presented.	Not reported: no descriptive data presented.	NR	F=1.3, p>0.05, NS; No DF reported	Mobility declined from premorbid level (i.e., prior to illness leading to amputation) to surgery. Mobility didn't reduce further with surgery. Mobility improved at 6 weeks, 4 months and 12 months, but typically did not return to pre morbid levels (about 12% lower in both TMA and TTA). Pattern of mobility decline and improvement were the same in TTA and TMA with no differences in LCI scores.
Mobility	Norvell DC, Turner AP, Williams RM, Hakimi KN, Czerniecki JM.	2011	Defining successful mobility after lower extremity amputation for complications of peripheral vascular disease and diabetes.						The objectives of this study were (1) to utilize the novel definition of “mobility success” to describe mobility outcome after lower extremity amputation due to peripheral vascuar disease and diabetes; (2) to compare rates of mobility success between various amputation levels; (3) to evaluate factors, independent of amputation level, associated with mobility success; (4) to explore the definition…	Cohort - Prospective	USA, 2 VA medical centers, a university hospital and a level 1 trauma center.	Unable to determine	(1) they were age 18 years or older, (2) they were awaiting (or underwent in the last 6 weeks) a first major amputation (defined as transmetatarsal level or higher), (3) the primary cause of amputation was complications of diabetes or peripheral vascular disease, (4) adequate cognitive or language function to consent or participate (defined by 6 or less errors on the Short Portable Mental Status …	Nil - Usual care	People with transmetatarsal and transtibial amputation were included as part of a larger cohort, including people with transfemoral amputation, to explore the utility of a measure of "mobility success", to compare rates of mobility success across amputation levels, to identify factors associated with mobility success and to describe the association between mobility success and satisfaction with m…	n=27 premorbid n=26 at 12 months			n=27 premorbid n=26 at 12 months					complications of diabetes or PVD	1	1	63±7.8	Stroke, Heart attack, Dialysis, Chronic obstructive pulmonary disease, Lower extremity arterial reconstruction, Traumatic brain injury, Joint replacement, Hypertension, Posttraumatic stress disorder, Smoker, Alcohol consumption, Charlston Commorbidity Index	Age, Sex, BMI, Marital status, Race, Employment status, Education level, Living status, Socioeconomic status	n=52 premorbid n=42 at 12 months	complications of diabetes or PVD	0.85	0.88	61.5±9.1	Assessed 6 weeks and 12 months post-amputation surgery	Stroke, heart attack, dialysis, chronic obstructive pulmonary disease, lower extremity arterial reconstruction, traumatic brain injury, joint replacement, hypertension, post-traumatic stress disorder, smoker, alcohol consumption, Charlston Commorbidity Index	Age, sex, BMI, marital status, race, employment status, education level, living status, socioeconomic status.	LCI-5; also assessed satisfaction with mobility using a single question created for the study and Satisfaction With Life Scale for life satisfaction.	premorbid LCI-5 score = 49.1 ± 9.8 12 month LCI-5 score = 43.2 ± 12.5 change score = -5.9 ± 11.5 mobility success rate = 35%	premorbid LCI score = 47.1 ± 12.3 12 mth LCI-5 score = 40.7 ± 16.2 change score = -6.4 ± 14.7 mobility success rate = 41%		Mobility success across 3 groups (p=0.78, Pearson X2 test); change score across 3 groups (p=.19, ANOVA) Premorbid mobility across 3 groups (p=0.76, not sure how this was assessed) .	Most baseline demographics and health factors were similar across amputation levels except for a significantly (P = .01) larger proportion of individuals with diabetes in the TM group (100%) compared with theTT (85%) and TF groups (50%). The proportion of smokers increased with higher levels of amputation. Premorbid mobility (LCI score prior to disability) was similar between all amputation level…

## Sheet: 6. Mortality
									Study overview							Participants - PFA														Participants - TTA							Outcome (repeat blocks of rows as necessary for each outcome measure)
Review topic	Author	Year	Title	Journal	Volume	Issue	Pages	Abstract	Aim as stated	Study design	Setting/data source	Recruitment method	Inclusion	Type of intervention(s)	Summarise the study: provide context for data entry	Total No PFA (N)	Toes (n)	MTP (n)	TMA (n)	Lisfranc - Tarsometatarsal (n)	Chopart - transtarsal (n)	Ray (n)	Other (n)	Cause of amputation	Percent w/ diabetes (%)	Sex (% male)	Age (Mean ±SD years)	Comorbidities reported	Sociodemographic details	Total No TTA (N)	Cause of amputation	Percent w/ diabetes (%)	Sex (% male)	Age (Mean ±SD years)	Comorbidities reported	Sociodemographic details	Measure(s)	How was the outcome measure determined?	PFA	TTA	Difference	Sig	Result summary (take home message)
Mortality
Mortality	Brown, M., W. Tang, A. Patel and J. Baumhauer	2012	Partial foot amputation in patients with diabetic foot ulcers	Foot and Ankle International	33	9	707-716.	Background: Transtibial amputations (TTA) are performed for recalcitrant or infected ulcers of the midfoot, hindfoot, or ankle. This procedure results in decreased ambulatory status caused by increased oxygen demands and energy expenditure. Partial foot amputations have the advantage of being an end-bearing limb and require less work to walk, theoretically suggesting improved functional outcome. …	To examine morbidity, mortality, proximal ipsilateral reamputation and functional outcome in diabetic patients with recalcitrant foot ulcers treated with partial foot amputations compared to transtibial amputations.	Cohort - Retrospective	USA, Orthopaedic surgery department, Rochester NY/ medical record review following hospital billing database for recruitment based on procedure codes.	Convenience	Underwent transtibial or partial foot amputation (i.e., transmetatarsal amputation, Chopart or partial/total calcanectomy) for non-healing lower-extremity ulceration secondary to diabetes between Jan 1, 1995 and July 1, 2009.	Usual care	Retrospective review of transtibial amputation and select levels of partial foot amputation from one orthopaedic surgical service in NY, USA. Mortality was primary endpoint. Probability of mortality at 1 ,3, and 5 years post index amputation estimated from Kaplan-Meier curves based on follow up concluding at July 1 2009 (completion of last enrollment) - some 14.5 years after study start date. Stu…	64 feet (Table 5 incorrectly reports this as patients but the n values sum to 82 which is the total number of feet not patients)			21 feet		10 feet		33 feet - partial (n=17 feet) and total (n=16 feet) calcanectomy	PVD and/or DM	1		Transmetatarsal: 53.8±12.8 Chopart: 56.8±12.6 Partial calcanectomy: 53.4±13.6 Total calcanectomy: 63.8±13.0	Diebtes, ASA-PS (Anastheiologists Physical Scale), HbA1c, body mass index, renal dialysis, post-operative ambulatory statues (Volpicelli Ambulatory Scale)	Age	18 feet (Table 5 incorrectly reports this as patients but the n values sum to 82 which is the total number of feet not patients)	PVD and/or DM	1	Not reported	58.6±12.3	Age, ASA-PS (Anastheiologists Physical Scale), HbA1c, BMI, Num renal dialysis, post-operative ambulatory statues (Volpicelli Ambulatory Scale)	Not reported	Mortality with point estimates at 1, 3, 5 years from survival curves	Kaplan Meier estimates	1 year mortality probability TMA: 0 Chopart: 20 Partial calcanectomy: 12 Total calcanectomy: 38 3 year mortality probability TMA: 5 Chopart: 30 Partial calcanectomy: 38 Total calcanectomy: 38 5 year mortality probability TMA: 30 Chopart: 40 Partial calcanectomy: 69 Total calcanectomy: 59	1 year mortality probability TTA: 23% 3 year TTA:30% 5 year TTA: 45%		The only significant difference in mortality between TTA and any PFA level was the TMA vs TTA at 1 and 3 year mortality (p<0.05)	Mortality lower in TMA relative to TTA and other levels of PFA. Calcanectomy mortality rates are very high and may reflect the influence of factors other than amputation level (e.g., perhaps those with calcanectomy had more advanced vascular disease, or more significant ulceration that required this type of procedure).
Mortality	Dillingham, T. R. and L. E. Pezzin	2008	Rehabilitation setting and associated mortality and medical stability among persons with amputations	Archives of Physical Medicine & Rehabilitation	89	6	1038-1045	OBJECTIVE: To estimate the differences in outcomes across postacute care settings-inpatient rehabilitation, skilled nursing facility (SNF), or home-for dysvascular lower-limb amputees. DESIGN: Medicare claims data for 1996 were used to identify a cohort of elderly persons with major lower-limb dysvascular amputations. One-year outcomes were derived by analyzing claims for this cohort in 1996 and …	The purpose of this study was to examine factors affecting discharge destination and to provide insights into the relationship between postacute rehabilitation setting and 12-month outcomes among elderly persons undergoing major lower-limb amputations secondary to peripheral vascular diseases.	Cohort - Retrospective	USA, 5% Medicare claims 1996.	Random (irrespective of method of randomisation)	Dysvascular lower limb ampuation in USA during 1996. Excluding toe amputations, trauma and tumor causes. Medicare beneficiary.	Usual care	Based on random sample of 5% of USA Medicare beneficiaries with dysvascular lower limb amputation in 1996. Retrospective review of data looking at (dependent variables) 12 month mortality, probability of reamputation, prosthetic prescription, subsequent hospital admissions stratified by discharge destination; (independent variables) home, rehabilitation or skilled nursing facility. Outcomes for '…	379								PVD and/or DM	Given aim of study, demographic and social factors reported for whole lower limb amputee sample or by discharge destination. Therefore, can only make inferences about partial foot/transtibial samples based on entire lower limb amputee sample. 70% lower limb amputee sample had DM.	Given aim of study, demographic and social factors reported for whole lower limb amputee sample or by discharge destination. Therefore, can only make inferences about partial foot/transtibial samples based on entire lower limb amputee sample. 49% males.	Given aim of study, demographic and social factors reported for whole lower limb amputee sample or by discharge destination. Therefore, can only make inferences about partial foot/transtibial samples based on entire lower limb amputee sample. Age reported in three categories, most people in 65-74 (31%) or 75-84 (32%) year age groups.	Number of comorbidities based on comprehensive list including, as illustrative examples: renal disease, tumors, myocardial infarc, congestive heart failure, DM, HT, peotic ulcers, depression, alcohol use… etc…(bottom column 1, pg 1040);	Geographic region, race, age, sex, index amputation level,	949		Given aim of study, demographic and social factors reported for whole lower limb amputation sample or by discharge destination. Therefore, can only make inferences about PFA/TTA samples based on entire lower limb amputation sample. 70% lower limb amputation sample had DM.	Given aim of study, demographic and social factors reported for whole lower limb amputation sample or by discharge destination. Therefore, can only make inferences about PFA/TTA samples based on entire lower limb amputation sample. 49% males - low.	Given aim of study, demographic and social factors reported for whole lower limb amputation sample or by discharge destination. Therefore, can only make inferences about PFA/TTA samples based on entire LLA sample. Age reported in three categories, most people in 65-74 (31%) or 75-84 (32%) year age groups.	Number of comorbidities (based on comhrehensive list - renal disease, tumors, myocardial infarc, congestive heart failure, DM, HT, peotic ulcers, depression, alcohol use… etc…(bottom column 1, pg 1040);	Geographic region, race, age, sex, index amputation level	One year survival (mortality) stratified by discharge destination (%)	Number and percent; probabilities based on multivariate logistic regression models that controlled for confounding influence of a wide range of social and demographic factors confounding comparison between discharge destinations, not amputation levels.	1 year mortality by discharge destination: Rehab (30%) Skilled nursing facility (25%) Home (30%)	1 year mortality by discharge destination: Rehab (24%) Skilled nursing facility (34%) Home (43%)		Aim not designed to compare PFA and TTA groups	PFAs have lower 1 year mortality compared to TTA.
Mortality	Dillingham, T. R., Pezzin, L. E., Shore, A. D.	2005	Reamputation, mortality, and health care costs among persons with dysvascular lower-limb amputations	Archives of Physical Medicine & Rehabilitation	86	3	480-6	OBJECTIVES: To examine 12-month reamputation and mortality rates as well as acute and postacute medical care costs among a large cohort of persons with dysvascular amputations. DESIGN: Retrospective cohort study. SETTING: General community. PARTICIPANTS: Medicare beneficiaries identified from the Centers for Medicare and Medicaid Services data as undergoing a lower-limb amputation secondary to va…	The purpose of this study was to examine 12-month reamputation and mortality rates among a large cohort of persons with dysvascular amputations. Reamputation and mortality rates as well as costs associated with medical treatment of dysvascular amputees, by amputation level and presence or absence of diabetes, were examined by using data from a nationally representative sample of Medicare benefici…	Cohort - Retrospective	USA, population study of Medicare beneficiaries.	Random (irrespective of method of randomisation)	Dysvascular, lower limb only, amputation in 1996.	Usual care	Given the aim of the study, sociodemographic data have only been reported for the overall group as well as subgroups with diabetes melitus and without. No sociodemograhpic data by level of amputation. The available sociodemographic data does allow some assessment of the population (e.g., typical-to-older ampution group, age distribution, etc.) Data is avaiable, by level of amputation, for % morta…	1451	1072						379 (defined as foot & ankle, Symes excluded)	PVD and/or DM	Reported for whole lower limb amputee sample or by discharge destination. Therefore, can only make inferences about partial foot and transtibial subjects based on entire lower limb amputee sample. 83% diabetes.	Reported for whole lower limb amputee sample or by discharge destination. Therefore, can only make inferences about partial foot and transtibial subjects based on entire lower limb amputee sample. 52% males	Reported for whole lower limb amputee sample or by discharge destination. Therefore, can only make inferences about partial foot and transtibial subjects based on entire lower limb amputee sample: mean age 73.7 years. No SD reported.	Number comorbidities, age at first amputation, Age at death, Number admissions within 12 months post index amputation, Number of amputations related admissions 12 months post index amputation	Age, sex, race	950	PVD	0.79	Not reported for PFA/TTA cohorts, but overall lower limb amputee sample was 52% male	Not reported for PFA/TTA cohorts, but overall lower limb amputation sample, mean age 73.7 years. No SD reported.	Number comorbidities, age at first amputation, Age at death, Number admissions within 12 months post index amputation, Number of amputations related admissions 12 months post index amputation	Race, age, sex	1 year mortality after index amputation (%)	Number and percent; probabilities based on multivariate logistic regression models that controlled for confounding influence of a wide range of social and demographic factors confounding comparison between discharge destinations, not amputation levels.	Whole sample Toe (22.8%) Foot and/or ankle (28.5%) Diabetics Toe (22.7%) Foot and/or ankle (27.1%)* Non-diabetics Toe (24.5%) Foot and/or ankle (35.4%)	Whole sample Transtibial (35.5%) Diabetics Transtibial (34.0%)* Non-diabetics Transtibial (41.5%)	Whole sample Toe vs TTA (12.7%) Foot and/or ankle vs TTA (7% ) Diabetics Toe vs TTA (11.3% ) Foot and/or ankle vs TTA (7% ) Non-diabetics Toe vs TTA (17.5%) Foot and/or ankle vs TTA (6.1% )	Not reported	Mortality at 12 months were higher with more proximal levels of amputation. Mortality rates were significantly worse in those with diabetes (compared to those without) in the foot and/or ankle as well as the transtibial amputation groups. No inferential analysis comparing mortality rates between the transtibial and partial foot groups.
Mortality	Evans, K. K., C. E. Attinger, A. Al-Attar, C. Salgado, C. K. Chu, S. Mardini and R. Neville	2011	The importance of limb preservation in the diabetic population	Journal of Diabetes & its Complications	25	4	227-231	OBJECTIVE: Limb salvage in the diabetic population is complex, controversial, costly and variable throughout the world. Within the diabetic population, the indications and morbidity surrounding major leg amputation have not been well defined. RESEARCH DESIGN AND METHODS: A retrospective study of the Georgetown Limb Salvage Registry was conducted to determine outcomes in diabetic patients undergoi…	The purpose of this study was to assess our multidisciplinary approach to limb salvage by (1) analyzing the limb salvage rate of the patients requiring either transmetatarsal (TMA), Chopart or Lisfranc amputation for closure and (2) comparing and contrasting these populations to determine risk factors and indications for major leg amputation.	Cohort - Retrospective	USA, University Medical Centre Washington DC/ Georgetown Limb Salvage Register/ limb centre and hospital chart records to demographic, etiology, other conditions.	Convenience	Included on limb salvage register between 1990-1999, ambulatory patient with limb threatening foot pathology, forefoot/midfoot breakdown requiring treatment with transmetatarsal, Lisfranc or Chopart amputation (or higher). Patients who were bedridden or non-ambulatory were excluded as were those who did not go on to amputation or had incomplete records (n=16 of 129 people that met the other inclu…	Usual care	Retrospective review of charts for people with different levels of partial foot and transtibial amputation. While the aim was to compare limb salvage rates with three levels of partial foot amputation AND to compare these populations for risk factors, the study really focuses on comparing the partial foot amputee cohort (all levels combined) with a transtibial amputee cohort. Numerous paired comp…	88			58	17	13			DM	100	0.57	70 (no SD)	Diabetes, neuropathy, coronary arterial disease, Hypertension, peripheral vascular disease, chronic renal failure, contralateral amputation, Charcot collapse	Age, sex	25	DM	100	0.76	69 (no SD reported)	Diabetes, neuropathy, coronary arterial disease, Hypertension, peripheral vascular disease, chronic renal failure, contralateral amputation, Charcot collapse	Age, sex	2 year mortality	Simple count of number (%) amputees died at specific time point	20% of partial foot amputees died by 2 years.	No point estimate reported for the transtibial amputee mortality (i.e., 52% of transtibial amputees dead at time of final study with average survival of 640 days following transtibial amputation).			2-year mortality rate in PFA group was 20%. No breakdown by level of PFA. No point estimate for TTA sample given that the percentage that died at end of study, and average days survival, were reported instead.
Mortality	Glaser, J. D., R. P. Bensley, R. Hurks, S. Dahlberg, A. D. Hamdan, M. C. Wyers, E. L. Chaikof and M. L. Schermerhorn	2013	Fate of the contralateral limb after lower extremity amputation	Journal of Vascular Surgery	58	6	1571-1577.e1571	OBJECTIVE: Lower extremity amputation is often performed in patients where both lower extremities are at risk due to peripheral arterial disease or diabetes, yet the proportion of patients who progress to amputation of their contralateral limb is not well defined. We sought to determine the rate of subsequent amputation on both the ipsilateral and contralateral lower extremities following initial…	Aim not stated in introduction, but in abstract: We sought to determine the rate of subsequent amputation on both the ipsilateral and contralateral lower extremities following initial amputation.	Cohort - Retrospective	USA, Boston, Chart review.	Convenience	Primary admission diagnosis code (ICD9) was related to nonhealing wounds with or without peripheral arterial disease or ischemic rest pain. Lower extremity ampuation at any level (84.10-84.19) between 1998-2010 at single institution.	Usual care	Retrospective chart review of patients admitted for minor (toe or transmetatarsal amputation) or major (through ankle or more proximal) due to non-healing wounds. Primary outcomes related to major amputation; secondary outcomes include ipsilateral reamputation, contralateral reamputation and mortality. Estimates generated from Kaplan-Meier estimates.	1140	Not reported		Not reported				Only toe and transmetatarsal amputations, but no number by level of 'minor' amputation	PVD and/or DM	73.6	67.3	66.6±13.5	Diabetic, chronic renal failure, end-stage renal disease, hypertension	Age, sex, non-white race								Estimated percentage died at 1, 3, 5 years	Kaplan Meier	Mortality 1 year: 17.0% 3 years: 29.1% 5 years: 49%				Most reamputations occur within first year after index minor amputation (toe/TMA). Values likely underestimate because only index toe/TMAs included.
Mortality	Griffin, K. J., T. S. Rashid, M. A. Bailey, S. A. Bird, K. Bridge and J. D. Scott	2012	Toe amputation: a predictor of future limb loss?	Journal of Diabetes & its Complications	26	3	251-254	BACKGROUND: Digital toe amputation is a relatively minor surgical procedure but there is a historical view that it is the "first stage in a predictable clinical course" leading to eventual limb loss. There is a paucity of contemporaneous data on the long-term outcomes of patients undergoing toe amputation. We aim to study the experience from our institution, focussing on the risk factors for prog…	There is a paucity of contemporaneous data on the mid to long-term outcomes of patients undergoing toe amputation and the clinical factors which may help predict further amputation and/or limb loss. We aim to study the experience from our institution, by conducting a retrospective review of our practice.	Cohort - Retrospective	UK, Leeds University Hospital, Operative database, theatre records and patient medical history.	Convenience	Toe amputation (either single toe or multiple toes) between 2004-2008 at Leeds Hospital (exact name not clear), with complete records.	Usual care	Retrospective review of surgical/hospital records of people who underwent amputation of the toe(s) between 2004-2008. Primary endpoints included "further amputation (either below ankle (i.e., minor) or above ankle (i.e., major), subsequent limb loss and mortality." Median follow up 790 days (317-1791 days); affecting reporting of reamputation because no timepoint could be established. Mortality a…	63	63							PVD and/or DM	0.683	0.87	69 (no SD), range: 62-76.5 years.	Diabetes, Hypertension, smoking status, conorarty heart disease, cerebrovascular disease, renal failure, wound healing (e.g., vacuum therapy or involvement of hospital tissue viability team) use of revascularisation.	Age, sex, ethnicity								Mortality at 30 days and 1 year for toe amputees (%)	Simple count of number (%) amputees died at specific time point	30 day: 3.17%, 1 year: 19%
Mortality	Hambleton, I. R., R. Jonnalagadda, C. R. Davis, H. S. Fraser, N. Chaturvedi and A. J. Hennis	2009	All-cause mortality after diabetes-related amputation in Barbados: a prospective case-control study	Diabetes Care	32	2	306-307	OBJECTIVE: To determine the mortality rate after diabetes-related lower-extremity amputation (LEA) in an African-descent Caribbean population. RESEARCH DESIGN AND METHODS: We conducted a prospective case-control study. We recruited case subjects (with diabetes and LEA) and age-matched control subjects (with diabetes and no LEA) between 1999 and 2001. We followed these groups for 5 years to assess…	Aim not stated in introduction, but in abstract: To determine the mortality rate after diabetes-related lower-extremity amputation (LEA) in an African-descent Caribbean population.	Case control	Barbados.	Convenience	Self-reported as black race, diabetes.	Usual care	Case-control in which survival probabilities (Kaplein-Meier) and age-standardized all-cause mortality rates per 1000-person years were reported for a Carribean population with diabetes. Amputees convenience sampled through hospital surgical ward. Simple random sampling used to identify controls from electoral records for screening to meet inclusion.	123								DM	100	Sex not reported with breakdown by amputation level. Some assessment of representivenss possible because case subjects (i.e., all lower extremity amputations) had 44.9% males.	67.1±13.2	Diabetes, footwear type, symptoms of peripherial arterial disease, blood pressure, height, weight, body circumferences, foot pulses to identify peripheral vascular disease and Doppler for ankle blood pressure. Ankle Brachial Index, composite peripheral vascular disease index, presence of peripheral neuropathy and impaired protective sensation. Blood for GHb - see Hennis 2004 where methods explain…	Age, sex, self-assigned racial group, life style behaviours - see Hennis 2004 where methods explained more fully -	47	DM	1	Sex not reported with breakdown by amputation level. Some assessment of representivenss possible because case subjects (i.e., all lower extremity amputees) had 44.9% males.	Age not reported with breakdown by amputation level. Some assessment of representivenss possible because 'major' (which included transtibial as well as transfemoral amputees) had mean age of 75.7±10.3 years.	Diabetes, footwear type, symptoms of peripherial arterial disease, blood pressure, height, weight, body circumferences, foot pulses to identify peripheral vascular disease and Doppler for ankle blood pressure. Ankle Brachial Index, composite peripheral vascular disease index, presence of peripheral neuropathy and impaired protective sensation. Blood for GHb - see Hennis 2004 where methods explain…	Self-assigned racial group, life style behaviours - see Hennis (2004) where methods were explained more fully.	All cause mortality at 3 and 6 months and 1 and 5 years post index amputation in partial foot amputees and transtibial amputees (%)	Kaplan Meier estimates for probability at discrete time points, plus age standardized all cause mortality rate for partial foot ampuation and transtibial amputation with 95%CI, mortality rate ratio between partial foot amputation and major amputation with p-values.	3 months: 8% 6 months: 14% 1 year: 19% 5 years: 41% Age-adjusted all-cause mortality rates per 1000 person-years PFA: 113.4 (95%CI 85.2-150.9)	3 months: 32% 6 months: 36% 1 year: 40% 5 years: 72% Age-adjusted all-cause mortality rates per 1000 person-years TTA: 205.9 (95%CI 142.8-296.8)		Yes (p<0.001) for comparison of rate ratios for major/minor groups. Otherwise, significance not relevant for Kalpan-Meier estimates or presentation of mortality rates.	Mortality rate after TTA was almost twice that following PFA. Age-adjusted all-cause mortality rates per 1000 person-years Controls 36.4 (95%CI 25.6-51.8) Primary causes of death for all cases: sepsis (49%), cardiac disease (45%), pneumonia (17%) and renal problems (14%)
Mortality	Izumi, Y., K. Satterfield, S. Lee, L. B. Harkless and L. A. Lavery	2009	Mortality of first-time amputees in diabetics: a 10-year observation	Diabetes Research & Clinical Practice	83	1	126-131	AIMS: We analyze mortality of first-time diabetic amputees by stratifying by level of amputation, differentiating short-term and long-term mortality. METHODS: We evaluated 277 diabetic patients who received their first lower extremity amputation (LEA) during 1993-97. Subjects were followed until December 2003, and categorized by level of amputation. We compared the mortality difference by level f…	Our aims were to: (1) stratify mortality by level of amputation, (2) evaluate differences between short-term (< 10 months) and long-term mortality (>10 months), and (3) evaluate the association between comorbid conditions and death for each amputation level at different follow up periods for first time diabetic amputees.	Cohort - Retrospective	USA, Texas, University hospital.	Convenience	Diabetes, non-traumatic amputation, first time lower extremity amputation (not reamputations).	Not reported	Retrospective cohort study of people with diabetes undergoing first ever lower extremity amputation. Outcome measure was short-term (<10 months) and long term (> 10 months) mortality. Mortality rates estimated from Kaplan-Meier curves and compared between different levels of partial foot amputation (and 'major' amputation). Associations drawn between mortality rates and comorbidities (e.g., cereb…	213	61					114	38 midfoot including transmetatarsal, Lisfranc and Chopart	DM/PVD	100	Toe: 60.7%, Ray: 71.1%, Midfoot: 81.6%	Toe: 53.3±10.9 Ray: 52.4±10.5 Midfoot: 51.7±9.5	Peripheral arterial disease, end-stage renal disease, L/R bypass surgery	Gender, ethnicity, smoking status								10-month and 5-year mortality by level of partial foot ampuation	Kalpan-Meier survival analysis. Comparisons between amputee groups included age and sex as covariants in regression model so these demographic differences were controlled for.	The point estimates of 5-year mortality were toe 26.2%, ray 15.8%, midfoot (TMA/Lisfranc/Chopart) 21%, and major 36%. For short-term mortality (< 10 months), the point estimates were toe 6.6%, ray 4.4%, midfoot 10.5%, and major 18.2%. No differences in mortality rates between levels of partial foot amputation at any of the time points. Influence of comorbid conditions (PAD, CVD, CVA and ESRD) rep…				10 month and 5 year mortality rates comparable between groups with PFA. Effect of comorbid conditions was large but highly variable.
Mortality	Jindeel, A. and K. A. Narahara	2012	Nontraumatic amputation: incidence and cost analysis	International Journal of Lower Extremity Wounds	11	3	177-179	Lower extremity amputation (LEA) is devastating for those affected and a significant factor in health care costs. Although the overall incidence of amputation has been declining, the decline is not universal. The objectives of this study were to identify patients with nontraumatic amputation at Harbor-UCLA Medical Center (HUMC) from January 2000 to January 2007, to calculate their 1-year and 5-ye…	The objectives of this study are to characterize the incidence of nontraumatic amputations at Harbor-UCLA Medical Center (HUMC), calculate the 1-year and 5-year mortality rates after such amputations, and estimate the direct costs of these amputations.	Cohort - Retrospective	USA, Los Angeles County, tertiary hospital.	Convenience	Lower extremity amputation at Harbor UCLA medical centre between 2000-2006 without trauma, neoplasm or amputation elsewhere. Children also excluded.	Usual care	Retrospecive review of medical centre database to identify people with lower extremity amputation. Count and percentage mortality presented for each year and an average at 1 and 5 years.	594								Unclear	0.925	Not reported for partial foot amputation level. For entire lower extremity sample, 75% were male.	Not reported for partial foot amputation level. For entire lower extremity sample, mean age approx 55 years (no SD) given, age stratified by sex.	Diabetes	Sex, age, race,								Average number percentage mortality at 1- and 5-years in partial foot amputees (annual rates reported too)	Count and percentages	1 year: mean 9.1%, 5 year: mean 19.2%				Increasing age was a risk factor for 1 year mortality.
Mortality	Jones, R. N. and W. P. Marshall	2008	Does the proximity of an amputation, length of time between foot ulcer development and amputation, or glycemic control at the time of amputation affect the mortality rate of people with diabetes who undergo an amputation?	Advances in Skin & Wound Care	21	3	118-123	OBJECTIVES: The main purpose of the authors' research was to compare the 3- and 5-year mortality rates of diabetic patients who have undergone a lower-extremity amputation, evaluating the proximity of the amputation in 3 groups (toe and foot amputation, BKA, and AKA), the timing of the amputation (within or after 2 years of the onset of the foot ulcer), and the effect of glycemic control at the t…	To compare the 3- and 5-year mortality rates of diabetic patients who have undergone a lower-extremity amputation, evaluating the proximity of the amputation in 3 groups (toe and foot amputation, transtibial, transfemoral), the timing of the amputation (within or after 2 years of the onset of the foot ulcer), and the effect of glycemic control at the time of amputation, regardless of the level of…	Cohort - Retrospective	USA, Illiana Inpatients of Veterans Centre.	Convenience	Diabetes, diabetic foot ulcer, an amputation and electromyography studies, femoral duplex (angiography study).	Not reported	Retrospective review of charts for men with diabetic foot ulcers requiring amputation who were once inpatients of a veterans hospital. Compared 3 and 5 year mortality rates for three groups: toe amputation, transtibial and transfemoral. Age and HbA1c level reported for each group. All mortality data were reported as proportions. Interested in whether glycemic control and time between ulcer and am…	29	29							PVD and/or DM	100	100	71±6.8	Coronary artery disease or cerebral vascular disease, hypertension, renal insufficiency, and hyperlipidemia. Neurpoathy (loss of vibration, decreased reflexex, numbness or tingling. & protective sensation (10g Semms-Weinstein monofilament), peripheral vascular disease, Hemoglobin A1C level,	Age, sex	30	PVD and/or DM	1	1	70.8±7.2 years	Coronary artery disease or cerebral vascular disease, hypertension, renal insufficiency, and hyperlipidemia. Neurpoathy (loss of vibration, decreased reflexes, numbness or tingling, protective sensation (10g Semms-Weinstein monofilament), peripheral vascular disease, Haemoglobin A1C level.		3- and 5-year mortality in toe as well as transtibial amputee groups (%)	Simple count of number and percentage that died at specific time point	3-year mortality: 13.8% 5-year mortality: 41.4%	3-year mortality: 33.3% 5-year mortality: 63.3%		Only main effects for the Chi-Squared reported comparing toe, transtibial amputation and transfemoral amputation.	Mortality at 3 and 5 years was higher in TTAs than toe amputees.
Mortality	Kono, Y. and R. R. Muder	2012	Identifying the incidence of and risk factors for reamputation among patients who underwent foot amputation	Annals of Vascular Surgery	26	8	1120-1126	BACKGROUND: Many patients who have lower-extremity amputations secondary to peripheral vascular disease or diabetes require reamputation eventually. This study was designed to identify the incidence of and risk factors for ipsilateral reamputation after forefoot amputation, to evaluate whether postoperative infection increases the risk of reamputation, and to evaluate whether the risk of reamputa…	We aimed to (1) identify the incidence of and risk factors for ipsilateral reamputation after forefoot amputation; (2) evaluate whether postoperative infections increases the risk of reamputation; and (3) evaluate whether the risk of reamputation was reduced by the duration of antimicrobial therapy after amputation.	Cohort - Retrospective	USA, VA Pittsburg.	Convenience	Non-traumatic, foot amputation (both cause and amputation level not operationally defined), foot amputation in VA hospital Pittsburg between January 2002 and December 2004 (presume beginning and end of year given no dates were specified).	Usual care	Retrospective review of people with non-traumatic, foot amputation (both cause and amputation level not defined) but appear to be forefoot (see aims) or forefoot and hindfoot (see caption Table 1). A wide range of factors thought to affect ipsilateral reamputation and mortality rates were recorded as part of data extraction. Study didn't report incidence of reamputation but rather a percentage of…	116							amputation level not operationally defined (Table 1 caption suggests a mix of hindfoot, midfoot, metatarsal and toe amputations)	Unclear	0.802	0.991	66.8±11.0	Urgency of surgery, site of amputation, operation time, wound closure, hospitalization day, current smoking, Type 2 diabetes, diabetic neuropathy, end-stage renal disease, history coronary arterial disease, immuniosuppresent used, history contralateral/ipsilateral amputatuion, history of revascularisation, physical exam, lab tests, malnutrition, ABI, imaging studies, cultures, use of antibiotics …	Age, sex,								All-cause mortality at 3 years	Counts and percentages	45.7% died in 3 years post index amputation				Descriptive study reporting 3 year all cause mortality.
Mortality	Kristensen, M. T., G. Holm, K. Kirketerp-Moller, M. Krasheninnikoff and P. Gebuhr	2012	Very low survival rates after non-traumatic lower limb amputation in a consecutive series: what to do?	Interactive Cardiovascular & Thoracic Surgery	14	5	543-547	The aim of this retrospective study was to evaluate factors potentially influencing short- and long-term mortality in patients who had a non-traumatic lower limb amputation in a university hospital. A consecutive series of 93 amputations (16% toe/foot, 33% trans-tibial, 9% through knee and 42% trans-femoral) were studied. Their mean age was 75.8 years; 21 (23%) were admitted from a nursing home a…	The aim of this study was to evaluate the factors potentially influencing short- and long-term survival rates of patients with a non-traumatic lower limb amputation.	Cohort - Retrospective	Denmark, Tertiary hosputal.	Convenience	Non-traumatic amputation in 2009 at the Hvidovre Hospital Denmark; toe/foot, transtibial, through-knee or transfemoral amputation.	Usual care	Retrospective review of hospital charts for people undergoing non-traumatic lower extremity amputation in 2009 in a Danish hospital. 30-, 90- and 365 day-mortality rates (counts and percentages) reported for a old and likely unwell sample (given large proportion were in nursing home, had multiple comorbidities, and required through-knee or above-knee amputation) resulting in very high rates of mo…	15								PVD and/or DM	0.53	0.8	73.8±14.5	Contralateral amputation, cause of amputation, ASA scale (anesthology scale), and number of comorbidities (not operationally defined or measured using valid instrument), length of stay	Age, sex, residence (i.e., home, nursing home)	31	PVD and/or DM	0.387	0.58	73.9±12.6	Contralateral amputation, cause of amputation, ASA scale (anesthesiology scale), and number of comorbidities (not operationally defined or measured using valid instrument), length of stay	Age, sex, residence (i.e., home, nursing home)	Number and percentage 30 day and 1 year mortality in partial foot and transtibial groups; other mortality rates (e.g., perioperative) reported for sample as a whole, not by level of amputation.	Counts and percentages for mortality rates	30-day mortality (20%) 1 year mortality (40%)	30 day mortality (29%) 1 year mortality (58%)			PFA have lower 30- and 365-day mortality compared to TTA.
Mortality	Mayfield, J. A., G. E. Reiber, C. Maynard, J. M. Czerniecki and et al.	2001	Survival following lower-limb amputation in a veteran population	Journal of Rehabilitation Research and Development	38	3	341-345	We sought to describe the common demographic and comorbid conditions that affect survival following nontraumatic amputation. Survival following lower-limb amputation is impaired by advancing age, cardiovascular and renal disease, and proximal amputation level.	We undertook this analysis to describe the determinants of survival following amputation in US veterans discharged from the Veterans Health Administration facilities in 1992.	Cohort - Retrospective	USA, Seattle, VA centre.	Convenience	Veterans discharged in 1992 with toe, transmetatarsal, transtibial or transfemoral levels. Did not have amputation due to 'major' trauma or cancer.	Usual care	Retrospective review of Veterans Administration records identifing mortality following discharge for amputation in 1992. The follow up point was 6 years later. Probability of mortality estimated from Kaplan-Meier analysis.	2234	1795		439					Unclear	Reported only for the whole lower extremity sample (61%), not by level of amputation.	Reported only for the whole lower extremity sample (99%), not by level of amputation.	Reported only for the whole lower extremity sample (66 No SD), not by level of amputation.	Diabetes, renal disease, cardiovascular disease (dichotomised by diagnosis congestive heart failure)	Age, sex, race, married	1381	Unclear	Reported only for the whole lower extremity sample (61%), not by level of amputation.	Reported only for the whole lower extremity sample (99%), not by level of amputation.	Reported only for the whole lower extremity sample (66, No SD), not by level of amputation.	Diabetes, renal disease, cardiovascular disease (dichotomized by diagnosis of congestive heart failure)	Race, married	Percentage mortality 30-day and 5-years by level	Kalpan-Meier survival analysis	Toe 30 day mortality: 1.7% 3-year mortality: Not reported by level 5-year mortality: 46% Transmetatarsal 30 day mortality: 2.7% 3- year mortality: Not reported by level 5-year mortality: 45%	TTA 30 day mortality: 7.0% 3-year mortality: Not reported by level 5-year mortality: 56%			Based on the descriptive data, 30 day mortality was comparable in toe and TMA, but a bit higher in TTA. At 5 years, toe and TMA had comparable rates of mortality, which were marginally worse for TTAs.
Mortality	Sandnes, D. K., M. Sobel and D. R. Flum	2004	Survival after lower-extremity amputation	Journal of the American College of Surgeons	199	3	394-402	BACKGROUND: Lower extremity amputation has long been considered an end-of-life event and it is unclear if survival after amputation has improved over time. STUDY DESIGN: A retrospective cohort comprised from a statewide, hospital discharge database was used to determine if survival after amputation improved with time. The cohort included all patients (older than 18 years) with nontraumatic, lower…	The purpose of this study was to determine if survival after lower extremity amputation has improved over time across a broad population of patients.	Cohort - Retrospective	USA, Washington State/ Washington State Comprehensive Hospital Abstract reporting System (CHARS).	Convenience	Over 18 years, non-traumatic and non-neoplasm related amputations.	Not reported	Based on a statewide, population-based hospital discharge database, authors determined incidence rate, and probability of mortality in three different time periods from 1987-2000. Incidence-rate and Kaplan-Meier estimates not able to be provided by authors and, as such, only data in figures are available. Figure 4 includes 'percentage alive' but it isn't clear how this data were derived.	4434	Not reported		Not reported					Unclear	66	61.1	66±15.5	Charlston comorbidity index, diabetes, COPD, Renal disease, diabetic complications (retinopathy)	Age, sex	5298	Unclear	0.63	0.619	68±15.51	Charlson comorbidity index, diabetes, COPD, renal disease, diabetic complications (retinopathy)	Age, sex	30 days, 1 year and 5 years survival in transtibial and toe/transmetatarsal amputees (Figure 4)	Not clear. The only relevant data are the 'percentage alive' reported in Figure 4. It is not clear from the manuscript (nor could it be clarified from correspondance with the authors - as at 9.2.2016) whether the data in Figure 4 was derived from the Kaplan-Meier probabilities of reports on the 25% of the sample that were followed for 5 years. Seems that the results in Figure 4 are likely to be a…	30 day Mortality (inverse % survival) 1987-89 Toe/Transmetatarsal: 3.7%, 1990-94 Toe/Transmetatarsal: 3.6%, 1995-2000 Toe/Transmetatarsal: 2.8%, 1 year Mortality (inverse % survival) 1987-89 Toe/Transmetatarsal: 17.4%, 1990-94 Toe/Transmetatarsal: 16.9%, 1995-2000 Toe/Transmetatarsal: 13.5%, 5 year Mortality (inverse % survival) 1987-89 Toe/Transmetatarsal: 45.3%, 1990-94 Toe/Transmetatarsal: 45.…	30 day Mortality (inverse % survival) 1987-89 TTA: 9.5% 1990-94 TTA: 6.9% 1995-2000 TTA: 6.1% 1 year Mortality (inverse % survival) 1987-89 TTA: 25.6% 1990-94 TTA: 24% 1995-2000 TTA: 19.6% 5 year Mortality (inverse % survival) 1987-89 TTA: 55.0% 1990-94 TTA: 55.2% 1995-2000 TTA: 40.0%		Not reported	Unclear how mortality was calculated but data as presented suggest toe/TMA have a slightly better survival, at 30 days, 1 year and 5 years compared to TTA at all time points.
Mortality	Sheahan MG, Hamdan AD, Veraldi JR, McArthur CS, Skillman JJ, Campbell DR, et al.	2005	Lower extremity minor amputations: The roles of diabetes mellitus and timing of revascularization	J Vasc Surg	42		476-80	Introduction: Despite the frequent performance of minor foot amputations in patients with lower extremity vascular disease, little is known regarding the rate of conversion to major amputations and the role of bypass graft timing in relation to amputation. Methods: Between January 1990 and December 2001, 670 patients underwent 920 minor amputations (interphalangeal, ray, or transmetatarsal) on 74…	The purpose of this study is to review a 12-year experience with lower extremity minor amputations and investigate which risk factors best predict patient survival and limb loss. As diabetic and nondiabetic patients have been shown to have similar healing rates after minor foot amputations, we have included both groups in this series. Our hypothesis is that a carefully planned multidisciplinary a…	Cohort - Retrospective	USA, New Orleans, data from surgical register and patient records.	Convenience	Interphalangeal, ray or transmetatarsal amputations between 1.1.1990-15.12.2001; at Beth Israel Medical Centre New Orleans; peripheral vascular disease.		Retrospective review of surgical/medical records at a single hospital over 12 year period looking at outcome from partial foot amputation (i.e., interphalangeal, ray or transmetatarsal); looking at 30 day, 1- and 5-year mortality with no breakdown by level of partial foot amputation.	670 patients/774 limbs	466 interphalangeal		159			122		PVD and/or DM	0.919	0.699	Not reported	Diabetes, tabacco use, hypertension, conorary arterial disease, renal insufficiencey, dialysis dependent	Sex								30-day operative mortality; 1 and 5 year survival rate	Kaplan Meier estimates	30 day: 2.9% (22/747 limbs); 3.3% (22/670 people) 1 year: 16.1% 5 year: 56.5%				Mortality rate increased over time, from 30 days post-op, to 1 and 5 years.
Mortality	Stone, PA; Back, MR; Armstrong, PA; et al.:	2005	Midfoot amputations expand limb salvage rates for diabetic foot infections.					The persistent high incidence of limb loss resulting from advanced forefoot tissue loss and infection in diabetic patients prompted an evaluation of transmetatarsal (TMA) and transtarsal/midfoot amputations in achieving foot salvage at our tertiary vascular practice. Over the last 8 years, 74 diabetic patients required 77 TMAs for tissue loss and/or infection. Twelve (16%) of the patients had a c…	We report our recent experience with transtarsal amputation to salvage nonhealing TMAs in diabetic patients.	Cohort - Retrospective	USA, Florida, Veterans hospital.	Not clear	Not clear	Usual care	Study very difficult to follow. Suggest a retrospective review of records from 74 people with an index transmetatarsal amputation. Outcomes related to healing and mortality reported at different time points.	74			74					PVD and/or DM	100	86.5	64 (No SD, range 45-8)	Tobacco use,hyperlipidemia, end-stage renal disease, contralateral major amputation ('major' not operationally defined);	Age, sex								Perioperative (60 day), 1- 3- and 5-year mortality (%)	Kaplan Meier	Perioperative (60 days): 5.4% 1 year: 28% 3 years: 31% 5 years: 70%
Mortality	Vamos, E. P., A. Bottle, A. Majeed and C. Millett	2010	Trends in lower extremity amputations in people with and without diabetes in England, 1996-2005	Diabetes Research & Clinical Practice	87	2	275-282	AIMS: To examine trends in non-traumatic lower extremity amputations over a 10-year-period in people with and without diabetes (DM) in England. METHODS: All individuals admitted to NHS hospitals for non-traumatic amputations between 1996 and 2005 in England were identified using hospital activity data. Postoperative and 1-year mortality were examined between 2000 and 2004. RESULTS: There was a re…	The objective of this study was to describe time trends in lower extremity amputation procedures in people with and without diabetes between 1996 and 2005 using national hospital admission data from all NHS hospitals in England. We also describe perioperative and 1-year mortality between 2000 and 2004.	Cohort - Retrospective	UK, NHS Hospital Episode Statistics database covering public admissions to NHS.	Convenience	Amputation surgery in public system (NHS), non-traumatic lower extremity amputation between 1996-2006.	Usual care	Retrospective review of NHS admissions database for lower extremity amputation procedures between 1996-2006. Outcomes were number and percentage that died at 30- days and 1 year post index amputation. Age- and sex-standardized incidence rate per 100,000 population stratified by amputation level (i.e., minor vs major) as well as presence/type of diabetes (i.e., Type 1, Type 2 and no DM). Minor amp…	5487 (jn 2005)								Unclear	Not reported for partial foot sample, but for lower extremity amputation group as a whole. 40% of sample had diabetes (13.5% type 1, 26.5% type 2).	Proportion of males reported by diabetes type for 1996/1997: type 1: 68.6% males, type 2: 72.1% males, no diabetes: 38.9% males. And 2005/2006: type 1: 72.7%, type 2: 74.3%, no diabetes 43.8%.	Mean age and interquartile range with breakdown by diabetes type for 1996/1997 (type 1: 61.7; type 2: 68.0; no diabetes: 65.4 years) and 2005/2006 (type 1: 57.2, type 2: 67.8, no diabetes: 66.3). Interquartile range reported in Table 1.	Diabetes - type I and Type II, no diabetes	Age, sex, socioeconomic status (from index of multiple deprivation)								Number and percentage that died at 30-days and 1 year post index amputation	Counts	30 day Total 2000/1, 2.3% 2004/5, 3.1% Type I DM 2000/1, 3.4% 2004/5, 2.1% Type II DM 2000/1, 2.8% 2004/5, 3.8% No DM 2000/1, 1.8% 2004/5, 2.9% 1 year Total 2000/1, 13.5% 2004/5, 15.5% Type I DM 2000/1, 17.5% 2004/5, 14.1% Type II DM 2000/1, 18.1% 2004/5, 19.9% No DM 2000/1, 10.4% 2004/5, 12.7%				Proportion of sample that died at 30-days and 1 year post partial foot amputation remained stable over time with little difference as a result of presence or type of diabetes.
Mortality	Winell, K., M. Venermo, T. Ikonen and R. Sund	2013	Indicators for comparing the incidence of diabetic amputations: a nationwide population-based register study	European Journal of Vascular & Endovascular Surgery	46	5	569-574	OBJECTIVE: To test various indicators for comparing the outcomes of diabetic foot care. DESIGN: All 396,317 patients treated with hypoglycaemic medication in Finland were followed up based on nationwide registers on hospital discharges and causes of death during 1997-2007. MATERIALS AND METHODS: The crude and standardized incidences of lower extremity amputations (LEAs), the minor-major ratio of …	In the current study, we aimed at studying several outcome indicators for evaluating the effectiveness of foot care in the presentation of lower extremity amputation. The applicability of these indicators for detecting regional and temporal variation in foot care over time was tested among Finnish patients with diabetes.	Cross sectional	Finland, national registers (i.e., Hospital discharge registers, reimbursment registers of the Social Insurance Institution, National cause of death register).	Convenience	National residents (Finland), diabetics (ICD-8 and ICD-9 code 250 and with ICD-10 codes E10-14 - excluded gestational diabetics), lower extremity amputation (excluding trauma, neoplasms), includes ALL amputation (index and reamputations).	Usual care	Registrants were first identified from a drug register of people with diabetes (identified as people who required medication for glucose control). These registrants were then cross-matched to a database of people who underwent lower extremity amputation. Care not to confuse with outcomes reported for 2 year survival with intact leg. While the incidence data may seem appropriate at first glance, t…	1997:520, 2007:706								DM	100	Not reported	Not reported	Diabetes.									2 year survival following minor (PFA), % and 95%CI, for Finland as well as discrete geographic regions in 1997-2000 and 2004-2007.	Mortality rates were age- and sex- standardized to either the geographic region of interest (e.g., Helsinki) of the whole Finnish population. 2 year survival were calculated using the Kaplan-Meier method (inverse to obtain a mortality rate). Results presented as a proportional survival with 95%CI.	2 year survival: 1997-2000: 64.5%, 60.5-68.7% 2004-2007: 65.4%, 61.6-69.3% Used survival data to determine mortality (i.e., 100-survival rate = mortality rate) 2 year mortality: 1997-2000: 35.5%, 95%CI 31.3-39.5% 2004-2007: 34.6%, 95%CI 30.7-38.4%				2 year mortality rate associated with partial foot amputation is 35%, with little variability as evidenced by the narrow confident interval (95%CI 31-38).

## Sheet: 1-6. All outcomes
									Study overview							Participants - PFA														Participants - TTA							Outcome (repeat blocks of rows as necessary for each outcome measure)
Review topic	Author	Year	Title	Journal	Volume	Issue	Pages	Abstract	Aim as stated	Study design	Setting/data source	Recruitment method	Inclusion	Type of intervention(s)	Summarize the study: provide context for data entry	Total Number PFA (N)	Toes (n)	MTP (n)	TMA (n)	Lisfranc - Tarsometatarsal (n)	Chopart - Transtarsal (n)	Ray (n)	Other (n)	Cause of amputation	Percent with diabetes (%)	Sex (% male)	Age (Mean ±SD years)	Comorbidities reported	Sociodemographic details	Total No TTA (N)	Cause of amputation	Percent with diabetes (%)	Sex (% male)	Age (Mean ±SD years)	Comorbidities reported	Sociodemographic details	Measure(s)	How was the outcome measure determined?	PFA	TTA	Difference	Sig	Result summary (take home message)
Wound healing and complications
Wound healing and complications	Andrews, K. L., M. Y. Dib, T. C. Shives, T. L. Hoskin, D. A. Liedl and A. J. Boon	2013	Noninvasive Arterial Studies Including Transcutaneous Oxygen Pressure Measurements with the Limbs Elevated or Dependent to Predict Healing After Partial Foot Amputation						The objective of the current study was to assess the use of noninvasive arterial studies including TcPO2 to predict healing, to determine whether the use of physiologic maneuvers (elevation and dependency) could improve the utility of TcPO2 measurements in predicting healing, and to determine whether demographic factors significantly improve the prediction of healing for patients who underwent pa…	Cohort - Retrospective	USA, tertiary care facility.	Convenience	Patients who underwent partial foot amputation after noninvasive vascular studies between the years 1992 and 2007 if they authorized a review of their medical records. Patients who had noninvasive arterial studies, did not have revascularization (surgical or endovascular) at the same time as amputation, did not have revascularization between their noninvasive arterial studies and amputation, had …	Noninvasive arterial studies completed prior to amputation	A retrospective cohort with various levels of partial foot amputation. Various noninvasive arterial studies had been performed prior to amputation; some performed only on a portion on the sample. For our purposes, wound healing was reported as healing within 3 months, healing in 3-12 months, or non-healing.	307	172		47			81	7 ('combined' - not defined)	Not reported	79	70	65.5±14.8	hypertension, smoking status, presence of diabetes, HbA1c, ABI,	age, sex,								Healed within 3 months or between 3-12 months	Counts and percentages	61% healed within 3 months; 9% healed in 3-12 months; (so 1 year healed rate was 70% including those healed within 3 months as well as those that healed between 3-12 months)				61% healed 3 months, 70% at 1 year
Wound healing and complications	Evans, K. K., C. E. Attinger, A. Al-Attar, C. Salgado, C. K. Chu, S. Mardini and R. Neville	2011	The importance of limb preservation in the diabetic population	Journal of Diabetes & its Complications	25	4	227-231	OBJECTIVE: Limb salvage in the diabetic population is complex, controversial, costly and variable throughout the world. Within the diabetic population, the indications and morbidity surrounding major leg amputation have not been well defined. RESEARCH DESIGN AND METHODS: A retrospective study of the Georgetown Limb Salvage Registry was conducted to determine outcomes in diabetic patients undergoi…	The purpose of this study was to assess our multidisciplinary approach to limb salvage by (1) analyzing the limb salvage rate of the patients requiring either transmetatarsal (TMA), Chopart or Lisfranc amputation for closure and (2) comparing and contrasting these populations to determine risk factors and indications for major leg amputation.	Cohort - Retrospective	USA, University Medical Centre Washington DC/ Georgetown Limb Salvage Register/ limb centre and hospital chart records to demographic, etiology, other confitions.	Convenience	Included on limb salvage register between 1990-1999, ambulatory patient with limb threatening foot pathology, forefoot/midfoot breakdown requiring treatment with transmetatarsal amputation, Lisfranc or Chopart amputation (or higher). Patients who were bedridden or non-ambulatory were excluded as were those who did not go on to amputation or had incomplete records (n=16 of 129 people that met the …	Usual care	Retrospective review of charts for people with different levels of partial foot and transtibial amputation. While the aim was to compare limb salvage rates with three levels of partial foot amputation AND to compare these populations for risk factors, the study really focuses on comparing the partial foot cohort (all levels combined) with a transtibial cohort. Numerous paired comparisons of demog…	88			58	17	13			DM	100	0.57	70 (no SD reported)	Diabetes, neuropathy, coronary arterial disease, Hypertension, peripheral vascular disease, chronic renal failure, contralateral amputation, Charcot collapse	Age, sex	25	DM	1	0.76	69 (no SD reported)	Diabetes, neuropathy, coronary arterial disease, Hypertension, peripheral vascular disease, chronic renal failure, contralateral amputation, Charcot collapse	Age, sex	1 year - healed	Simple count of number healed, with percentages of wound failure results	86% limbs healed at 1-year. Perioperative complications rate of 42% including" 22% dehiscence; 8% revision to more proximal PFA; 14% revised to TTA.	TTA group: complications occurred in 28% (7/25) including: 8% dehiscence; 4% infection and 12% (3/25) local revision. No proportion healed reported.			86% of PFA healed at 1 year. Data for TTA not reported clearly: if all patients in BKA group were healed in 49 days, then that might mean 100% healed at 1 year.
Wound healing and complications	Lakstein, D., Z. Feldbrin, L. Schorr and A. Lipkin	2014	Primary closure of elective toe amputations in the diabetic foot - is it safe?	Journal - American Podiatric Medical Association	104	4	383-386.	Background: Toe amputation is the most common partial foot amputation. Controversy exists regarding whether to primarily close toe amputations or to leave them open for secondary healing. The purpose of this study was to evaluate the results of closed toe amputations in diabetic patients, with respect to wound healing, complications, and the need for further higher level amputation. Methods: We r…	Evaluate the results of closed toe amputations in diabetic patients, with regard to wound healing, complications and the need for further higher level amputation.	Cohort - Retrospective	Israel, Specialist Diabetic Foot Ulcer service.	Convenience	Diabetic patients undergoing elective or semi-elective toe amputation due to necrosis or osteomyelitis. Patients who did not have proximal involvement requiring ray or transmetatarsal amputations; have abscesses or necrotizing fasciitis; have extensive cellulitis or tenosynovitis which meant that clean margins could not be achieved; need revascularization surgery; fail to complete follow-up until…	Primary closure of toe amputation	Retrospective cohort following 35 patients with 40 toe amputations, from surgery until complete healing or further surgery, including reamputation.	35	35							PVD and/or DM	100	66	66.6±10.2	Involved toe, histopathology, bacteriology, outcome	Age, sex								Percentage healed at 3 weeks	Counts and percentages	75% healed within 3 weeks. (Treated as 30 of 40 amputations, not people). Can't determine the number of people from the original 35 that healed at 3 weeks.				With patients who were carefully selected, this service saw a low failure/high healing rate. Results were remarkably good: 75% healed completely in 3 weeks; 20% had delayed closure (no time point so can't include); 5% needed reamputation surgery at 4-weeks.
Wound healing and complications	Stone, PA; Back, MR; Armstrong, PA; et al.:	2005	Midfoot amputations expand limb salvage rates for diabetic foot infections.					The persistent high incidence of limb loss resulting from advanced forefoot tissue loss and infection in diabetic patients prompted an evaluation of transmetatarsal (TMA) and transtarsal/midfoot amputations in achieving foot salvage at our tertiary vascular practice. Over the last 8 years, 74 diabetic patients required 77 TMAs for tissue loss and/or infection. Twelve (16%) of the patients had a c…	We report our recent experience with transtarsal amputation to salvage nonhealing transmetatarsal amputations in diabetic patients.	Cohort - Retrospective	USA, FL Veterans hospital.	Not clear	Not clear	Usual care	Study very difficult to follow. Suggest a retrospective review of records from 74 people with an index transmetatarsal amputation. Outcomes related to healing and mortality reported at different time points.	74			74					PVD and/or DM	100	86.5	64 (No SD, range 45-8)	Tobacco use,hyperlipidemia, end-stage renal disease, contralateral major amputation ('major' not operationally defined);	Age, sex								Healed at 3 months after partial foot amputation	Counts and percentages	TMA healed at 3 months: 43% TMA failing at 3 months: 53%				43% TMA healed at 3 months
Ipsilateral reamputation
Reamputation	Dillingham, T. R. and L. E. Pezzin	2008	Rehabilitation setting and associated mortality and medical stability among persons with amputations						The purpose of this study was to examine factors affecting discharge destination and to provide insights into the relationship between postacute rehabilitation setting and 12-month outcomes among elderly persons undergoing major lower-limb amputations secondary to peripheral vascular diseases.	Cohort - retrospective	USA, 5% Medicare claims 1996.	Random (irrespective of method of randomisation)	Dysvascular lower limb amputation in USA during 1996. Excluding toe amputations, trauma and tumor causes. Medicare beneficiary.	Usual care	Based on random sample of 5% of USA Medicare beneficiaries with dysvascular lower limb amputation in 1996. Retrospective review of data looking at (dependent variables) 12 month mortality, probability of reamputation, prosthetic prescription, subsequent hospital admissions stratified by discharge destination; (independent variables) home, rehabilitation or skilled nursing facility. Outcomes for '…	379								PVD and/or DM	Given aim of study, demographic and social factors reported for whole lower limb amputee sample or by discharge destination. Therefore, can only make inferences about partial foot/transtibial samples based on entire lower limb amputation sample. 70% lower limb amputation sample had DM.	Given aim of study, demographic and social factors reported for whole lower limb amputee sample or by discharge destination. Therefore, can only make inferences about partial foot/transtibial samples based on entire lower limb amputee sample. 49% males.	Given aim of study, demographic and social factors reported for whole lower limb amputee sample or by discharge destination. Therefore, can only make inferences about partial foot/transtibial samples based on entire lower limb amputee sample. Age reported in three categories, most people in 65-74 (31%) or 75-84 (32%) year age groups.	Number of comorbidities based on comprehensive list including, as illustrative examples: renal disease, tumors, myocardial infarc, congestive heart failure, DM, HT, peotic ulcers, depression, alcohol use… etc…(bottom column 1, pg 1040);	Geographic region, race, age, sex, index amputation level,	949		Given aim of study, demographic and social factors reported for whole lower limb amputation sample or by discharge destination. Therefore, can only make inferences about PFA/TTA samples based on entire lower limb amputation sample. 70% of lower limb amputation sample had DM.	Given aim of study, demographic and social factors reported for whole lower limb amputation sample or by discharge destination. Therefore, can only make inferences about PFA/TTA samples based on entire lower limb amputation sample. 49% males - low.	Given aim of study, demographic and social factors reported for whole lower limb amputation sample or by discharge destination. Therefore, can only make inferences about PFA/TTA samples based on entire lower limb amputation sample. Age reported in three categories, most people in 65-74 (31%) or 75-84 (32%) year age groups.	Race, number of comorbidities (based on comhrehensive list - renal disease, tumors, myocardial infarc, congestive heart failure, DM, HT, peotic ulcers, depression, alcohol use… etc…(bottom column 1, pg 1040);	Geographic region, race, age, sex, index amputation level	One-year any reamputation (%)	Counts and precentages	Number of reamputations at 1 year by discharge destination: Rehab (5%) Skilled nursing facility (42%) Home (39%)	Number of reamputations at 1 year by discharge destination: Rehab (24%) Skilled nursing facility (21%) Home (24%)		Aim not designed to compare PFA and TTA groups	People with PFA who were discharged to rehab had a lower rate of reamputation than those discharged to skilled nursing facilities or to home.
Reamputation	Dillingham, T. R., L. E. Pezzin and A. D. Shore	2005	Reamputation, mortality, and health care costs among persons with dysvascular lower-limb amputations						The purpose of this study was to examine 12-month reamputation and mortality rates among a large cohort of persons with dysvascular amputations. Reamputation and mortality rates as well as costs associated with medical treatment of dysvascular amputees, by amputation level and presence or absence of diabetes, were examined by using data from a nationally representative sample of Medicare benefici…	Cohort - Retrospective	USA, population study of Medicare beneficiaries.	Random (irrespective of method of randomisation)	Dysvascular, lower limb amputation only, amputation in 1996.	Usual care	Given the aim of the study, sociodemographic data have only been reported for the overall group as well as subgroups with diabetes and without. No sociodemograhpic data by level of amputation. The available sociodemographic data does allow some assessment of the population (e.g., typical-to-older amputee group, age distribution, etc.) Data is available, by level of amputation, for percentage mort…	1451	1072						379 (defined as 'foot & ankle, but not Symes)	PVD and/or DM	Reported for whole lower limb amputee sample or by discharge destination. Therefore, can only make inferences about partial foot and transtibial subjects based on entire lower limb amputee sample. 83% diabetes	Reported for whole lower limb amputee sample or by discharge destination. Therefore, can only make inferences about partial foot and transtibial subjects based on entire lower limb amputee sample. 52% males	Reported for whole lower limb amputee sample or by discharge destination. Therefore, can only make inferences about partial foot and transtibial subjects based on entire lower limb amputee sample: mean age 73.7 years. No SD reported.	Number comorbidities, age at first amputation, Age at death, Number admissions within 12 months post index amputation, Number of amputations related admissions 12 months post index amputation	Race, age, sex.	950	PVD	0.79	Not reported for PFA/TTA cohorts, but overall lower limb amputation sample was 52% male	Not reported for PFA/TTA cohorts, but for overall lower limb amputation sample mean age was 73.7 years. No SD reported.	Number comorbidities, age at first amputation, Age at death, Number admissions within 12 months post index amputation, Number of amputations related admissions 12 months post index amputation	Race, age, sex	1 year - Reamputation rate after index amputation (%)	Counts and percentages	Whole sample Toe (34.9%: one reamputation: 24%, two or more reamputations: 10.9%) Foot and/or ankle (38.8%; one reamputation: 28.8%, two or more reamputations: 10.0%) Diabetics Toe (37.4%: one reamputation: 25.3%, two or more reamputations: 12.2%) Foot and/or ankle (40.1%; one reamputation: 29.0%, two or more reamputations: 11.1%) Non-diabetics Toe (23%: one reamputation: 17.5%, two or more reamp…	Whole sample Transtibial (33.0%; one reamputation: 19.7%, two or more reamputations: 3.3%) Diabetics Transtibial (24.6%; one reamputation: 20.6%, two or more reamputations: 4.0%) Non-diabetics Transtibial (16.7%; one reamputation: 16.2%, two or more reamputations: 0.5%)	Whole sample Toe vs TTA (1.9%: one reamp: 4.3%, two or more reamp:7.6%) Foot and/or ankle vs TTA (5.8%: one reamp: 8.9%, two or more reamp: 6.6%) Diabetics Toe vs TTA (12.8% one reamp 5.3%, two or more reamp:8.2%) Foot and/or ankle vs TTA (24.5% one reamp 9.3%, two or more reamp:7.1%) Non-diabetics Toe vs TTA (6.3% one reamp 1.3%, two or more reamp:5.0%) Foot and/or ankle vs TTA (15.6% one reamp …	Not reported	Rates of reamputation as 12 months were higher for those with an index partial foot compared to a transtibial. About 40% of diabetics with partial foot amputation progressed to higher amputation compared to just 25% of diabetics with an initial transtibial amputation. About 25% of non-diabetics with an index partial foot amputation progressed to higher amputation compared to 16% of index transtib…
Reamputation	Glaser, J. D., R. P. Bensley, R. Hurks, S. Dahlberg, A. D. Hamdan, M. C. Wyers, E. L. Chaikof and M. L. Schermerhorn	2013	Fate of the contralateral limb after lower extremity amputation						To further investigate factors that may lead to contralateral amputations.	Cohort - retrospective	US, Boston, Chart review.	Convenience	Primary admission diagnosis code (ICD9) was related to nonhealing wounds with or without peripheral arterial disease or ischemic rest pain. Lower extremity ampuation at any level (84.10-84.19) between 1998-2010 at single institution.	Usual care	Retrospective chart review of patients admitted for minor (toe or transmetatarsal amputation) or major (through ankle or more proximal) due to non-healing wounds. Primary outcomes related to major amputation; secondary outcomes include ipsilateral reamputation, contralateral reamputation and mortality. Estimates generated from Kaplan-Meier estimates.	1140	Not reported		Not reported				Only toe and transmetatarsal amputations, but no number by level of 'minor' amputation	PVD and/or DM	73.6	67.3	66.6±13.5	Diabetic, chronic renal failure, end-stage renal disease, hypertension	Age, sex, non-white race								Ipsilateral reamputation 1 and 5 years	Counts and percentages	Initial minor (toe/TMA) – to - ipsilateral minor 1 year: 14.2% 5 year: 19.9% Initial minor (toe/TMA) – to - ipsilateral major 1 years: 10.5% 5 years: 14.2%
Reamputation	Izumi, Y., K. Satterfield, S. Lee and L. B. Harkless	2006	Risk of reamputation in diabetic patients stratified by limb and level of amputation: a 10-year observation						In this retrospective cohort study, we aimed to (1) illustrate the difference between the reamputation risk for ipsilateral and contralateral limbs and (2) stratify the risk of reamputation by the original level of amputation.	Cohort - retrospective	USA, Texas, university hospital	Convenience	Patients with lower extremity amputation defined as surgical removal of bones by transection at any level, which were not autoamputations or resections of partial bone with the distal end intact. Patients were all diabetics who had no history of traumatic amputation, no prior lower extremity amputation, with complete records of their history of lower extremity amputation and follow up of at least…	Not reported	A retrospective cohort study where there were cohorts with toe, ray, midfoot (transmetatarsal, Chopart, Lisfranc) or major (Syme, transtibial, transfemoral, hip disarticulation) amputations. Data are presented for the 3 discrete groups of partial foot amputation. Results indicate statistically lower cumulative rates of ipsilateral reamputation in all partial foot cohorts compared to the major amp…	213	61					114	38 - "midfoot" - includes transmetatarsal, Chopart, Lisfranc	DM/PVD	100	Toe: 60.7%, Ray: 71.1%, Midfoot: 81.6%	Toe: 53.3±10.9 Ray: 52.4±10.5 Midfoot: 51.7±9.5	Peripheral arterial disease, end-stage renal disease, L/R bypass surgery	Gender, ethnicity, smoking status								Cumulative ipsilateral reamputation rates at 1, 3, 5 years for level of partial foot amputation	Counts and percentages	Values for each rate at 1, 3, and 5 years were as follows: toe: 22.8, 39.6, and 52.3%; ray: 28.7, 41.2, and 50%; midfoot: 18.8, 33.3, and 42.9%.				Best gleaned from fig 1,2,3. For all levels of PFA, cumlative rates of ispilateral reamputation were around 25% at 1 year. By 3 years, this was close to 40 % and by 5 years the figure had increased to about 45%. Lower rates were seen in the midfoot cohort compared to teh other PFA cohorts at all time points. suggest these are weighted by Nos to greate a PFA group. When weighted to reflect the dif…
Reamputation	Kono, Y. and R. R. Muder	2012	Identifying the incidence of and risk factors for reamputation among patients who underwent foot amputation						We aimed to (1) identify the incidence of and risk factors for ipsilateral reamputation after forefoot amputation; (2) evaluate whether postoperative infections increases the risk of reamputation; and (3) evaluate whether the risk of reamputation was reduced by the duration of antimicrobial therapy after amputation.	Cohort - Retrospective	USA, VA Pittsburg.	Convenience	Non-traumatic, foot amputation (both cause and amputation level not operationally defined). Foot amputation in VA hospital Pittsburg between Jan 2002 and Dec 2004 (presume beginning and end of year given no dates specified).	Usual care	Retrospective review of people with non-traumatic, foot amputation (both cause and amputation level not defined) but appear to be forefoot (see aims) or forefoot and hindfoot (see caption Table 1). A wide range of factors thought to affect ipsilateral reamputation and mortality rates were recorded as part of data extraction. Study didn't report incidence of reamputation but rather a percentage of…	116							Amputation level not operationally defined (Table 1 caption suggests a mix of hindfoot, midfoot, metatarsal and toe amputations); Table 1 suggests that the cohort with reamputation included a subcohort with hindfoot and midfoot amputation, while the cohort without reamputation only included people with transmetatarsal/toe amputations.	Unclear	0.802	0.991	66.8±11.0	Urgency of surgery, site of amputation, operation time, wound closure, hospitalization day, current smoking, Type 2 diabetes, diabetic neuropathy, end-stage renal disease, history coronary arterial disease, immuniosuppresent used, history contralateral/ipsilateral amputatuion, history of revascularisation, physical exam, lab tests, malnutrition, ABI, imaging studies, cultures, use of antibiotics …	Age, sex								Ipsilateral reamputation at 6 months and 3 year	Counts and percentages	38.8% of sample had ipsilateral reamputation in 6 months after index amputation. At three years, that number increasd to 49.1% of sample. (NB: the paper says 78.9% received reamputation with 6 months of first amputation - this statistic is reported in a misleading way in the article). Of the 116 people in the sample, 57 people (49.1% of the sample) went on to have ipsilateral reamputation within …				Aside: of the 57/116 (49%) that had reamputation at 3 years: 42 had one reamputation, 14 needed 2 reamputations, one had 3 reamputations. 15 progressed from toe to TMA, 24 patients progressed to TTA and 8 progressted to TFA (no initial level reported for those who progressed to TTA and TFA.
Reamputation	Lakstein, D., Z. Feldbrin, L. Schorr and A. Lipkin	2014	Primary closure of elective toe amputations in the diabetic foot - is it safe?						Evaluate the results of closed toe amputations in diabetic patients, with regard to wound healing, complications and the need for further higher level amputation.	Cohort - retrospective	Israel, specialist Diabetic Foot Ulcer clinic.	Convenience	Diabetic patients undergoing elective or semi-elective toe amputation due to necrosis or osteomyelitis. Patients who did not have proximal involvement requiring ray or transmetatarsal amputations; have abscesses or necrotizing fasciitis; have extensive cellulitis or tenosynovitis which meant that clean margins could not be achieved; need revascularization surgery; fail to complete follow-up until…	Primary closure of toe amputation	Retrospective cohort following 35 patients with 40 toe amputations, from surgery until complete healing or further surgery, including reamputation.	35	35							PVD and/or DM	100	66	66.6±10.2	Involved toe, histopathology, bacteriology, outcome	Age, sex								Number of cases that proceeded to reamputation at 4-weeks post index toe amputation; the 2 cases reported were both within 4 weeks of initial surgery.	Proportion of cases	4-week: 2 cases, 5.7%				With patients who were carefully selected, this service saw a low proportion reamputated reampution rate. Results were remarkably good: 75% healed completely in 3 weeks; 20% had delayed closure (no time point so can't include); 5% needed reamputation surgery at 4-weeks.
Reamputation	Younger, A. S. E., M. A. Awwad, T. P. Kalla and G. de Vries	2009	Risk factors for failure of transmetatarsal amputation in diabetic patients: a cohort study						The objective of this study therefore was to determine the factors affecting the outcome (conversion to transtibial amputation) of patients undergoing transmetatarsal amputation.	Case control	Canada, type of service not specified.	Unable to determine	Patients with a diabetic foot complication amenable to transmetatarsal amputation; patients with a 5th ray or toe amputation being converted to transmetatarsal amputation; able to converse with study coodinators; able to follow up at clinic until healing; not undergoing isolated ray amputations or calcanectomies; surgery not above the level of the metatarsals; patients without skin necrosis which…	Usual care	It appears that 68 people were followed. Of these, 21 people went on to have a transtibial amputation, forming the case group. This cohort was age- and sex-matched to a control group (n=21). There is no further mention of the remaining 26 people. The purpose of the study was to determine risk factors for failure of transmetatarsal amputation. As such, 22 risk factors which were recorded preoperat…	21			21					PVD and/or DM	100	81	60.4±11.8	Renal impairment, type of diabetes, smoking status, duration of diabetes, hemoglobin levels, HbA1c levels,	Age, sex	21	PVD and/or DM	1	0.81	56.3±10.9	Renal impairment, type of diabetes, smoking status, duration of diabetes, hemoglobin levels, HbA1c levels,	Age, sex	1-year ipsilateral reamputation	Counts and percentages	31% (21 of 68) TMAs had ipsilateral reamputation at 12 months			HbA1c: successful TMA cohort: 0.078±0.018 (n=6) Failed TMA cohort: 0.106±0.024 (n=6), p<0.001. Number of people who had debridement following initial TMA: Successful TMA cohort: 1 (n=21); Failed TMA cohort: 6 (n=21), p<0.05).	People who had debridement following initial transmetatarsal amputation were more likely to have revision surgery.
Quality of life
Quality of life	Boutoille, D. Féraille, A. Maulaz, D. Krempf, M.	2008	Quality of life with diabetes-associated foot complications: comparison between lower-limb amputation and chronic foot ulceration						The aim of this study was to get a better comprehension of the influence of amputation on physical and social aspects of our patients’ quality of life.	Case control	France, Centre Hospitalier Universitaire (inpatients and outpatients).	Convenience	Group 1: patients hospitalized between early 2002 and early 2004 in "our departments" who underwent an amputation for a diabetic foot ulcer, at least 1 year before the beginning of the study. Group 2: outpatients experiencing regular visits for a current foot ulcer, with no previous history of amputation.	Group 1: no description of treatment. Group 2: actively and regularly followed in outpatient clinic.	Study compared subjects with transtibial amputation to a foot ulcer group and subjects with transmetatarsal or toe amputations to the foot ulcer group. The transtibial and partial foot amputee subjects weren't compared directly. SF-36 subscale scores reported separately for transtibial and partial foot groups but demographics were only provided for amputee group as a whole.	19 (combined transmetatarsal and toe amputations)	Not reported		Not reported					PVD and/or DM	100	Not reported	68 (median), for all amputees; not reported by partial foot amputation cohort/level.	Duration of diabetes, HbA1C levels, BMI, neuroischemic ulcer present	Age	6	DM	1		68 (median) for all amputees; not reported for transtibial amputee cohort	Duration of diabetes, HbA1C levels, BMI, neuroischemic ulcer present	Age	Medical Outcome Study Short Form 36 (MOS SF-36)		Physical functioning 55 ± 29 Role-physical 58 ± 39 Bodily pain 75 ± 26 General health 39 ± 18 Vitality 46 ± 20 Social functioning 69 ± 26 Role emotional 61 ± 46 Mental health 61 ± 19	Physical functioning 35 ± 39 Role-physical 33 ± 34 Bodily pain 84 ± 20 General health 54 ± 20 Vitality 55 ± 22 Social functioning 62 ± 25 Role emotional 33 ± 42 Mental health 65 ± 21		Not reported given aim didn’t compare partial foot and transtibial cohorts.	Given that only descriptive data are reported for the TTA and PFA subjects, readers must make their own assessment about quality of life between amputee groups. Descriptive data suggest quality of life is similar between groups, albeit with large variability in the subscale scores and small groups.
Quality of life	Peters, E. J. Lavery, L. A. Armstrong, D. G.	2005	Diabetic lower extremity infection: influence of physical, psychological, and social factors						The objective of this study was to evaluate amputations among diabetic patients and to determine the functional level of these patients with the Sickness Impact Profile (SIP).	Case control	Not reported	Convenience	Group 1: patients with diabetes who had undergone amputation. Group 2: control subjects with diabetes who had not undergone amputation.		Study compared subjects with amputation to subjects without and provided a subgroup analysis comparing mid level amputations (toe, transmetatarsal, Lisfranc, and Chopart amputations) to high-level amputations (defined as both transtibial and transfemoral amputations).	26	Not reported		Not reported	Not reported	Not reported			PVD and/or DM	100	77.1% all amputees, not reported by partial foot level.	56.8±9.9 years for all amputees, not reported by partial foot level.	By all lower extremity amputees: duration of diabetes, HbA1C levels, BMI, coronary artery disease, missing pulse	Age, sex	8 transtibial amputees (grouped together with 1 transfemoral amputee and reported as the high level amputee group)	PVD and/or DM	1	77.1% all amputees, not reported by partial foot amputation level	56.8±9.9 years for all amputees, not reporetd by partial foot amputation level	By all lower extremity amputees: duration of diabetes, HbA1C levels, BMI, coronary artery disease, missing pulse	Age, sex	Sickness Impact Profile (SIP)		Psychosocial dimension 15.1 ± 9.1 Physical dimension 31.0 ± 14.7 Total score SIP 26.6 ± 10.3	Psychosocial dimension 14.0 ± 8.5 Physical dimension 40.6 ± 13.9 Total score SIP 30.5 ± 8.9		ANOVA comparing all 3 groups (mid-level, high-level amputation and no amputation): Psychosocial dimension p=0.945; Physical dimension p=0.001; Total score SIP p=0.029. This study seems to have used multiple ANOVAs for the SIP scores against amputation level. They have also used multiple Chi-squared tests to report statistical significance for many variables, but it's unclear how the data has been…	Data were provided for mid and high level amputation groups. While the number of PFA were clearly identified, the number of TTA were not. We sought clarification from the authors, who reported that there were 8 TTA and 1 TFA. Since we were unable to tease out the data for TTAs uniquely, the aggregate results for the high level data are included in the review as data for TTA given that a single TF…
Quality of life	Quigley, Matthew Dillon, Michael P Duke, Emily J	2015	Comparison of quality of life in people with partial foot and transtibial amputation: A pilot study						To compare quality of life in people with partial foot and transtibial amputation secondary to peripheral vascular disease and determine factors influencing quality of life in these cohorts.	Cross sectional	Australia, Large metropolitan hospital in Melbourne.	Convenience	Adults over 18 years of age, amputation due to peripheral vasular disease, either a unilateral transtibial amputation or partial foot amputation, and minimum 6 months post-amputation.	Usual care	Study compared quality of life in subjects with partial foot and transtibial amputation using a mail-in survey. Partial foot amputation levels described somewhat vaguely as fore and mid foot. Mean SF-36 Mental Health and Physical Component Scores provided in figure but not directly stated.	10							5 "forefoot" and 4 "midfoot"	PVD and/or DM	80	70	63±10	Duration of diabetes, presence of tissue breakdown, retinopathy, nephropathy, neuropathy	Age, sex	23	PVD and/or DM	0.7	0.6	68±10	Duration of diabetes, presence of tissue breakdown, retinopathy, nephropathy, neuropathy	Age, sex	(1) revised demographic information page from the Trinity Amputation and Prosthesis Experience Scales–Revised (TAPES-R) and (2) the SF-36v2 Health Survey. Results from the SF-36v2 are reported using a physical component summary (PCS) and a mental health component summary (MCS).		Mean SF-36 Mental Health Component and Physical Component summary scores only reported in Figure 1. Data provided in response to author request for clarification for partial foot amputees: PCS: 37.53±10.50; MCS: 48.78±12.72.	Mean MCS and PCS not stated but shown in Figure 1. Data provided in response to author request for clarification for transtibial amputees: PCS: 36.32±11.96; MCS: 52.33±10.78.		No significant differences in the PCS and MCS scores between partial foot and transtibial amputee groups. The only independent variables that contributed significantly to the PCS were time with diabetes and age. Only the presence of retinopathy contributed significantly to the MCS.	There was no significant difference in either the Physical or Mental Health Component scores between groups with partial foot or transtibial amputation, therefore quality of life was comparable in cohorts with partial foot and transtibial amputation. Of particular interest to our review, level of amputation was not a significant contributor to quality of life.
Functional ability
Function	Marzen-Groller, K. D., Tremblay, S. M., Kaszuba, J. Girodo, V. Swavely, D. Moyer, B. Bartman, K. Carraher, W. Wilson, E.	2008	Testing the effectiveness of the Amputee Mobility Protocol: A pilot study	Journal of Vascular Nursing	26	3	74-81	We studied prolonged length of stay (LOS) in the acute care setting on a medical-surgical vascular unit, related to loss of functional mobility status after lower extremity amputation, and implementation of the Amputee Mobility Protocol (AMP) as a standard of care for all patients pre- and post-lower extremity amputation who were admitted to the medical-surgical vascular unit. A comparative pre-p…	The aim of this study was to examine the impact of the Amputee Mobility Protocol (not amputee mobility predictor) on patients’ functional mobility and length of stay.	Cohort	USA, Community hospital, medical-surgical vascular unit.	Convenience	Adults (age not reported) who had transmetatartsal, transtibial or transfemoral amputation on the medical-surgical vascular unit.	New rehabilitation protocol known as the Amputee Mobility Protocol (not to be confused with amputee mobility predictor).	Assessment of length of stay and functional mobility before and after introduction of a new rehabilitation protocol. Descrpitive data for a modified Functional Index Measure (FIM) reported for two independent groups: transmetatarsal and transtibial groups (i.e., people with transmetatarsal or transtibial amputation in the old rehab program, and people with transmetatarsal and transtibial amputati…	13: Two independent samples; pre new rehab program (n=7); post new rehab program (n=6).			13					Not reported	Not reported	Not reported	Not reported	Not reported	Not reported	Total: 19. Pre new rehabilitation program (n=14); post new rehabilitation program (n=5).	Not reported	Not reported	Not reported	Not reported	Not reported	Not reported	Not reported	Modified FIM included: supine to sit, sit to supine transfers, stand and pivot out of bed transfers, sliding board transfers, sit to stand, stand to sit transfers, and ambulation distance. (These 'functional outcomes' have a very narrow, low-level, focus).	Pre introduction of new rehab protocol Stand to pivot 5 Sit to stand 3 Ambulation 25ft Post introduction of new rehab protocol Stand to pivot 6 Sit to stand 4 Ambulation 102ft	Pre introduction of new rehab protocol Stand to pivot 4 Sit to stand 2 Ambulation 4.7ft Post introduction of new rehab protocol Stand to pivot 6 Sit to stand 4 Ambulation Not reported	Pre introduction of new rehab protocol Stand to pivot 1 Sit to stand 1 Ambulation 20ft Post introduction of new rehab protocol Stand to pivot 0 Sit to stand 0 Ambulation NR	Not reported	The available descriptive data suggest that prior to implementation of the new rehab program, people with transmetatarsal amputation performed 1 category better on the modified FIM than their transtibial peers. By way of context, people with transmetatarsal amputation could perform the sit-to-stand (FIM score = 4) with 'minimal assistance' (i.e., patient expends more than 75% effort). In comparis…
Function	Peters, E.J.G., Childs, M.R., Wunderlich, R.P., Harkless, L.B., et al.	2001	Functional status of persons with diabetes-related lower-extremity amputations	Diabetes Care	24	10	1799-1804	OBJECTIVE— It is reasonable to predict that diabetes-related lower-extremity amputations have a detrimental impact on quality of life. However, we are unaware of any study in the medical literature describing the functional level of diabetic patients with amputations. The objective of this study was to evaluate amputations among diabetic patients and to determine the functional level of these pat…	The objective of this study was to evaluate amputations among patients with diabetes and to determine the functional status of patients with diabetes who had undergone amputation of the lower-extremity.	Case control	USA, one university hospital.	Convenience	Diabetes	Usual care	This study used the Sickness Impact Profile (SIP) to measure function and quality of life in a case-control study of people with diabetes and "midlevel" amputations (partial foot) or with "high level amputations" (transtibial/transfemoral), against a control group with diabetes and no history of amputation.	26	Not reported		Not reported	Not reported	Not reported			PVD and/or DM	1	77.1% all amputees, not reported by partial foot level.	56.8±9.9 years for all amputees, not reported by partial foot level.	By all lower extremity amputees: duration of diabetes, HbA1C levels, BMI, coronary artery disease, missing pulse	Age, sex	Mixed transtibial and transfemoral amputee cohort; therefore, only results from partial foot amputation cohort are able to be used							Sickness Impact Profile (SIP)		Psychosocial dimension: Case (PFA): 15.1±9.1 Control: 15.2±10.0. Physical dimension: Case (PFA):31.0±14.7, Control: 22.3±14.7. Total SIP: Case (PFA): 26.6±10.3, Control: 22.5±10.3.			Main effects: Psychosocial dimension: p=0.945; Physical dimension: p=<0.001; Total SIP: p=0.029. Physical function significantly better in no amputation vs midlevel (p=0.019) and no amputation vs high level (p=.001). No other post-hoc results reported with p-values.	No statistically significant differences in psychosocial dimension of SIP score between any of the three groups.
Mobility
Mobility	Brown, M.L., Tang, W., Patel, A. & Baumhauer, J.F.	2012	Partial foot amputation in patients with diabetic foot ulcers						The purpose of this study was to examine morbidity, mortality, proximal ipsilateral reamputation, and functional outcome in diabetic patients with recalcitrant foot ulcers.	Cohort - Retrospective	USA, one institution - type of institution not reported.	Purposive	Inclusion & exclusion criteria not explicitly stated. The data appears to be from all patients who underwent transtibial, transmetatarsal, Chopart’s, and calcanectomy (partial or total) amputations for nonhealing lower-extremity ulceration secondary to diabetes mellitus.	Nil - Usual care	Retrospective review of data from one institution served by 3 orthopedic surgeons, to compare mortality, morbidity, proximal ipsilateral reamputation and functional outcome in people who had received one of 4 levels of partial foot or transtibial amputation as a result of non-healing foot ulcers. The data applicable to our study is the functional outcome data, as measured with the Volpicelli Ambu…	65			21		10		Partial calcenectomy: 18; Total calcenectomy: 16	PVD and/or DM	100	Not reported	Transmetatarsal: 53.8±12.8; Chopart: 56.8±12.6; Partial calcenectomy: 53.4±13.6; Total calcenectomy: 63.8±13.0	Number of participants undergoing renal dialysis	Age, ASA-PS score, HbA1C, BMI, renal dialysis	18	PVD and/or DM	1	Not reported	58.6±12.3	Not stated; appears to be within 5 years of index amputation	Number of participants undergoing renal dialysis	Age, ASA-PS score, HbA1C, BMI, renal dialysis	Volpicelli Ambulatory Scale reported as means with SD: probably should be reported as medians as the data is ordinal	TMA: 4.3 ± 2.1; Chopart: 4.3 ± 2.9; partial calcanectomy: 4.3 ± 1.5; total calcanectomy: 3.3 ± 3.1	2.8 ± 2.4		Not reported	Mobility was better in all levels of PFA compared to TTA, but the risk of ipsilateral amputation was much higher, especially for Chopart and both partial and total calcanectomy.
Mobility	Czerniecki, J. M., A. P. Turner, R. M. Williams, K. N. Hakimi and D. C. Norvell	2012b	The effect of rehabilitation in a comprehensive inpatient rehabilitation unit on mobility outcome after dysvascular lower extremity amputation	Archives of Physical Medicine & Rehabilitation	93	8	1384-1391	OBJECTIVES: To (1) compare the total volume of rehabilitation therapy for patients ever attending a comprehensive inpatient rehabilitation unit (CIRU) versus never during the 12 months after amputation; (2) determine whether rehabilitation in a CIRU at any time in the first year after amputation results in greater mobility success compared with other types of rehabilitation environments of care; …	(1) to compare the total volume of rehabilitation therapy for patients ever receiving rehabilitation in a comprehensive inpatient rehabilitation unit (CIRU) versus never during the 12 months after amputation; (2) to determine whether the provision of rehabilitation in a CIRU at any time in the first year after amputation results in greater mobility success compared with other types of rehabilitat…	Cohort - Prospective	USA, 2 VA medical centres.	Unable to determine	Over 18 years, awaiting or underwent first major (transmetatarsal or higher) in last 6 weeks; primary cause of amputation diabetes melitus or peripheral vascular disease. Had adequate cognitive function and language to consent (<6 errors on Short Portable Mental Status Questionnaire), were ambulatory before amputation.	Nil - Usual care	People with transmetatarsal and transtibial amputation were included as part of a larger cohort, including people with transfemoral amputation, to explore the effect of rehabilitation in a comprehensive inpatient rehabilitation unit on mobility. The sample is a subsample of the participants in the Norvell et al. 2011 paper (p.2 - study design). For our purposes, this study reports on mobility as …	27			27					PVD and/or DM	Not reported for discrete groups based on amputation level. Lower extremity amputee cohort (CIRU 86%, No CIRU 86%).	Not reported: for discrete groups based on amputation level. Lower extremity amputee cohort was: CIRU (97% male), No CIRU (95% male)	Not reported for discrete groups based on amputation level. Lower extremity amputee cohort was: CIRU (60.8±6.9), No CIRU (65.7±8.4) years	Not reported: for discrete groups based on amputation level. Comorbidities reported for whole lower extremity sample included: Charlson Comorbidity Index, DM, Stroke, MCI, Dialysis, COPD, Arterial reconstruction, HT, Smoker, Alchol consumption score, Modified Social suppprt score, Major depressive disorder, Premorbid LCI-5	Not reported: for discrete groups based on amputation level. Variables reported for whole lower extremity sample included: Age, sex, BMI, relationship, race, employment, education level, residential status, economic status, precieved health,	39	PVD and/or DM	Not reported for discrete groups based on amputation level. Lower extremity amputee cohort was: CIRU: 86%, No CIRU: 86%	Not reported for discrete groups based on amputation level. Lower extremity amputee cohort was: CIRU: 97%, No CIRU: 95%	Not reported for discrete groups based on amputation level. Lower extremity amputee cohort was: CIRU: 60.8±6.9, No CIRU: 65.7±8.4 years	Not applicable: time series - measures at premodbid, surgery, 6 weeks, 4 months and 12 months post-surgery	Not reported for discrete groups based on amputation level. Comorbidities reported for whole lower extremity sample included: Charlson Comorbidity Index, DM, stroke, myocardial infarct, dialysis, COPD, arterial reconstruction, hypertension, smoker, alcohol consumption score, Modified Social Suppprt Score, major depressive disorder, premorbid LCI-5	Not reported for discrete groups based on amputation level. Variables reported for whole lower extremity sample included: age, sex, BMI, relationship, race, employment, education level, residential status, economic status, perceived health.	LCI-5 dichotomized and reported as percentage successfully returned to premorbid mobility	0.35	0.31	0.04	p=0.96, NS	There were no differences between TMA and TTA in the proportion of people that, at 12 months, had achieved their premorbid level of mobility. Factors influencing return to premorbid mobility included being treated in comprehensive inpatient rehab unit. Those with major depressive episodes and greater alochol use were less likely to be successful. Those with greater social support were more likely…
Mobility	Czerniecki, J. M., A. P. Turner, R. M. Williams, K. N. Hakimi and D. C. Norvell	2012a	Mobility Changes in Individuals With Dysvascular Amputation From the Presurgical Period to 12 Months Postamputation	Archives of Physical Medicine and Rehabilitation	93	10	1766-1773	Czerniecki JM, Turner AP, Williams RM, Hakimi KN, Norvell DC. Mobility changes in individuals with dysvascular amputation from the presurgical period to 12 months postamputation. Arch Phys Med Rehabil 2012;93:1766-73. Objectives: To describe changes in ambulation among individuals with lower-extremity amputation secondary to peripheral artery disease and/or diabetes prior to surgery through 12 mo…	Aim of the study was to: (1) describe the change in ambulatory function as a result of limb disability prior to amputation surgery among all participants and in a subset of patients enrolled presurgically, (2) describe the changes in ambulatory function over time from premorbid function to 12 months after amputation, and (3) identify the association between presurgical risk factors (including amp…	Cohort - Prospective	USA, 2 VA medical centres, 1 university hospital and a level 1 trauma centre.	Unable to determine	Over 18 years, awaiting or underwent first major (transmetatarsal or higher) in last 6 weeks; primary cause of amputation diabetes melitus or peripheral vascular disease. Had adequate cognitive function and language to consent (<6 errors on Short Portable Mental Status Questionnaire), were ambulatory before amputation.	Nil - Usual care	People with transmetatarsal and transtibial amputation were included as part of a larger cohort, including people with transfemoral amputation, to describe changes in mobility from presurgery to 12 months post surgery, to compare differences in mobility by amputation level, and to examine risk factors for change in mobility over time. For our purposes, this study reports on mobility as measured w…	27			27					PVD and/or DM	1	Not reported for discrete groups based on amputation level	63±7.8	Charlson Comorbidity Index, DM, Stroke, MCI, Dialysis, post traumatic stress, Arterial reconstruction, HT, Smoker, Alchol consumption score, Modified Social suppprt score, Treated for anxiety/depression, Premorbid LCI-5	Age, sex, BMI, relationship, race, employment, education level, residential status, economic status, precieved health,	52	PVD and/or DM	0.85	Not reported	61.5±9.1	Not applicable: time series - measures at premodbid, surgery, 6 weeks, 4 months and 12 months post-surgery	Charlson Comorbidity Index, DM, stroke, myocardial infarct, dialysis, post traumatic stress, arterial reconstruction, hypertension, smoker, alcohol consumption score, Modified Social Suppprt Score, treated for anxiety/depression, premorbid LCI-5	Age, sex, BMI, relationship, race, employment, education level, residential status, economic status, perceived health.	LCI-5	Not reported: no descriptive data presented.	Not reported: no descriptive data presented.	NR	F=1.3, p>0.05, NS; No DF reported	Mobility declined from premorbid level (i.e., prior to illness leading to amputation) to surgery. Mobility didn't reduce further with surgery. Mobility improved at 6 weeks, 4 months and 12 months, but typically did not return to pre morbid levels (about 12% lower in both TMA and TTA). Pattern of mobility decline and improvement were the same in TTA and TMA with no differences in LCI scores.
Mobility	Norvell DC, Turner AP, Williams RM, Hakimi KN, Czerniecki JM.	2011	Defining successful mobility after lower extremity amputation for complications of peripheral vascular disease and diabetes.						The objectives of this study were (1) to utilize the novel definition of “mobility success” to describe mobility outcome after lower extremity amputation due to peripheral vascuar disease and diabetes; (2) to compare rates of mobility success between various amputation levels; (3) to evaluate factors, independent of amputation level, associated with mobility success; (4) to explore the definition…	Cohort - Prospective	USA, 2 VA medical centers, a university hospital and a level 1 trauma center.	Unable to determine	(1) they were age 18 years or older, (2) they were awaiting (or underwent in the last 6 weeks) a first major amputation (defined as transmetatarsal level or higher), (3) the primary cause of amputation was complications of diabetes or peripheral vascular disease, (4) adequate cognitive or language function to consent or participate (defined by 6 or less errors on the Short Portable Mental Status …	Nil - Usual care	People with transmetatarsal and transtibial amputation were included as part of a larger cohort, including people with transfemoral amputation, to explore the utility of a measure of "mobility success", to compare rates of mobility success across amputation levels, to identify factors associated with mobility success and to describe the association between mobility success and satisfaction with m…	n=27 premorbid n=26 at 12 months			n=27 premorbid n=26 at 12 months					complications of diabetes or PVD	1	1	63±7.8	Stroke, Heart attack, Dialysis, Chronic obstructive pulmonary disease, Lower extremity arterial reconstruction, Traumatic brain injury, Joint replacement, Hypertension, Posttraumatic stress disorder, Smoker, Alcohol consumption, Charlston Commorbidity Index	Age, Sex, BMI, Marital status, Race, Employment status, Education level, Living status, Socioeconomic status	n=52 premorbid n=42 at 12 months	complications of diabetes or PVD	0.85	0.88	61.5±9.1	Assessed 6 weeks and 12 months post-amputation surgery	Stroke, heart attack, dialysis, chronic obstructive pulmonary disease, lower extremity arterial reconstruction, traumatic brain injury, joint replacement, hypertension, post-traumatic stress disorder, smoker, alcohol consumption, Charlston Commorbidity Index	Age, sex, BMI, marital status, race, employment status, education level, living status, socioeconomic status.	LCI-5; also assessed satisfaction with mobility using a single question created for the study and Satisfaction With Life Scale for life satisfaction.	premorbid LCI-5 score = 49.1 ± 9.8 12 month LCI-5 score = 43.2 ± 12.5 change score = -5.9 ± 11.5 mobility success rate = 35%	premorbid LCI score = 47.1 ± 12.3 12 mth LCI-5 score = 40.7 ± 16.2 change score = -6.4 ± 14.7 mobility success rate = 41%		Mobility success across 3 groups (p=0.78, Pearson X2 test); change score across 3 groups (p=.19, ANOVA) Premorbid mobility across 3 groups (p=0.76, not sure how this was assessed) .	Most baseline demographics and health factors were similar across amputation levels except for a significantly (P = .01) larger proportion of individuals with diabetes in the TM group (100%) compared with theTT (85%) and TF groups (50%). The proportion of smokers increased with higher levels of amputation. Premorbid mobility (LCI score prior to disability) was similar between all amputation level…
Mortality
Mortality	Brown, M., W. Tang, A. Patel and J. Baumhauer	2012	Partial foot amputation in patients with diabetic foot ulcers	Foot and Ankle International	33	9	707-716.	Background: Transtibial amputations (TTA) are performed for recalcitrant or infected ulcers of the midfoot, hindfoot, or ankle. This procedure results in decreased ambulatory status caused by increased oxygen demands and energy expenditure. Partial foot amputations have the advantage of being an end-bearing limb and require less work to walk, theoretically suggesting improved functional outcome. …	To examine morbidity, mortality, proximal ipsilateral reamputation and functional outcome in diabetic patients with recalcitrant foot ulcers treated with partial foot amputations compared to transtibial amputations.	Cohort - Retrospective	USA, Orthopaedic surgery department, Rochester NY/ medical record review following hospital billing database for recruitment based on procedure codes.	Convenience	Underwent transtibial or partial foot amputation (i.e., transmetatarsal amputation, Chopart or partial/total calcanectomy) for non-healing lower-extremity ulceration secondary to diabetes between Jan 1, 1995 and July 1, 2009.	Usual care	Retrospective review of transtibial amputation and select levels of partial foot amputation from one orthopaedic surgical service in NY, USA. Mortality was primary endpoint. Probability of mortality at 1 ,3, and 5 years post index amputation estimated from Kaplan-Meier curves based on follow up concluding at July 1 2009 (completion of last enrollment) - some 14.5 years after study start date. Stu…	64 feet (Table 5 incorrectly reports this as patients but the n values sum to 82 which is the total number of feet not patients)			21 feet		10 feet		33 feet - partial (n=17 feet) and total (n=16 feet) calcanectomy	PVD and/or DM	1		Transmetatarsal: 53.8±12.8 Chopart: 56.8±12.6 Partial calcanectomy: 53.4±13.6 Total calcanectomy: 63.8±13.0	Diebtes, ASA-PS (Anastheiologists Physical Scale), HbA1c, body mass index, renal dialysis, post-operative ambulatory statues (Volpicelli Ambulatory Scale)	Age	18 feet (Table 5 incorrectly reports this as patients but the n values sum to 82 which is the total number of feet not patients)	PVD and/or DM	1	Not reported	58.6±12.3	Age, ASA-PS (Anastheiologists Physical Scale), HbA1c, BMI, Num renal dialysis, post-operative ambulatory statues (Volpicelli Ambulatory Scale)	Not reported	Mortality with point estimates at 1, 3, 5 years from survival curves	Kaplan Meier estimates	1 year mortality probability TMA: 0 Chopart: 20 Partial calcanectomy: 12 Total calcanectomy: 38 3 year mortality probability TMA: 5 Chopart: 30 Partial calcanectomy: 38 Total calcanectomy: 38 5 year mortality probability TMA: 30 Chopart: 40 Partial calcanectomy: 69 Total calcanectomy: 59	1 year mortality probability TTA: 23% 3 year TTA:30% 5 year TTA: 45%		The only significant difference in mortality between TTA and any PFA level was the TMA vs TTA at 1 and 3 year mortality (p<0.05)	Mortality lower in TMA relative to TTA and other levels of PFA. Calcanectomy mortality rates are very high and may reflect the influence of factors other than amputation level (e.g., perhaps those with calcanectomy had more advanced vascular disease, or more significant ulceration that required this type of procedure).
Mortality	Dillingham, T. R. and L. E. Pezzin	2008	Rehabilitation setting and associated mortality and medical stability among persons with amputations	Archives of Physical Medicine & Rehabilitation	89	6	1038-1045	OBJECTIVE: To estimate the differences in outcomes across postacute care settings-inpatient rehabilitation, skilled nursing facility (SNF), or home-for dysvascular lower-limb amputees. DESIGN: Medicare claims data for 1996 were used to identify a cohort of elderly persons with major lower-limb dysvascular amputations. One-year outcomes were derived by analyzing claims for this cohort in 1996 and …	The purpose of this study was to examine factors affecting discharge destination and to provide insights into the relationship between postacute rehabilitation setting and 12-month outcomes among elderly persons undergoing major lower-limb amputations secondary to peripheral vascular diseases.	Cohort - Retrospective	USA, 5% Medicare claims 1996.	Random (irrespective of method of randomisation)	Dysvascular lower limb ampuation in USA during 1996. Excluding toe amputations, trauma and tumor causes. Medicare beneficiary.	Usual care	Based on random sample of 5% of USA Medicare beneficiaries with dysvascular lower limb amputation in 1996. Retrospective review of data looking at (dependent variables) 12 month mortality, probability of reamputation, prosthetic prescription, subsequent hospital admissions stratified by discharge destination; (independent variables) home, rehabilitation or skilled nursing facility. Outcomes for '…	379								PVD and/or DM	Given aim of study, demographic and social factors reported for whole lower limb amputee sample or by discharge destination. Therefore, can only make inferences about partial foot/transtibial samples based on entire lower limb amputee sample. 70% lower limb amputee sample had DM.	Given aim of study, demographic and social factors reported for whole lower limb amputee sample or by discharge destination. Therefore, can only make inferences about partial foot/transtibial samples based on entire lower limb amputee sample. 49% males.	Given aim of study, demographic and social factors reported for whole lower limb amputee sample or by discharge destination. Therefore, can only make inferences about partial foot/transtibial samples based on entire lower limb amputee sample. Age reported in three categories, most people in 65-74 (31%) or 75-84 (32%) year age groups.	Number of comorbidities based on comprehensive list including, as illustrative examples: renal disease, tumors, myocardial infarc, congestive heart failure, DM, HT, peotic ulcers, depression, alcohol use… etc…(bottom column 1, pg 1040);	Geographic region, race, age, sex, index amputation level,	949		Given aim of study, demographic and social factors reported for whole lower limb amputation sample or by discharge destination. Therefore, can only make inferences about PFA/TTA samples based on entire lower limb amputation sample. 70% lower limb amputation sample had DM.	Given aim of study, demographic and social factors reported for whole lower limb amputation sample or by discharge destination. Therefore, can only make inferences about PFA/TTA samples based on entire lower limb amputation sample. 49% males - low.	Given aim of study, demographic and social factors reported for whole lower limb amputation sample or by discharge destination. Therefore, can only make inferences about PFA/TTA samples based on entire LLA sample. Age reported in three categories, most people in 65-74 (31%) or 75-84 (32%) year age groups.	Number of comorbidities (based on comhrehensive list - renal disease, tumors, myocardial infarc, congestive heart failure, DM, HT, peotic ulcers, depression, alcohol use… etc…(bottom column 1, pg 1040);	Geographic region, race, age, sex, index amputation level	One year survival (mortality) stratified by discharge destination (%)	Number and percent; probabilities based on multivariate logistic regression models that controlled for confounding influence of a wide range of social and demographic factors confounding comparison between discharge destinations, not amputation levels.	1 year mortality by discharge destination: Rehab (30%) Skilled nursing facility (25%) Home (30%)	1 year mortality by discharge destination: Rehab (24%) Skilled nursing facility (34%) Home (43%)		Aim not designed to compare PFA and TTA groups	PFAs have lower 1 year mortality compared to TTA.
Mortality	Dillingham, T. R., Pezzin, L. E., Shore, A. D.	2005	Reamputation, mortality, and health care costs among persons with dysvascular lower-limb amputations	Archives of Physical Medicine & Rehabilitation	86	3	480-6	OBJECTIVES: To examine 12-month reamputation and mortality rates as well as acute and postacute medical care costs among a large cohort of persons with dysvascular amputations. DESIGN: Retrospective cohort study. SETTING: General community. PARTICIPANTS: Medicare beneficiaries identified from the Centers for Medicare and Medicaid Services data as undergoing a lower-limb amputation secondary to va…	The purpose of this study was to examine 12-month reamputation and mortality rates among a large cohort of persons with dysvascular amputations. Reamputation and mortality rates as well as costs associated with medical treatment of dysvascular amputees, by amputation level and presence or absence of diabetes, were examined by using data from a nationally representative sample of Medicare benefici…	Cohort - Retrospective	USA, population study of Medicare beneficiaries.	Random (irrespective of method of randomisation)	Dysvascular, lower limb only, amputation in 1996.	Usual care	Given the aim of the study, sociodemographic data have only been reported for the overall group as well as subgroups with diabetes melitus and without. No sociodemograhpic data by level of amputation. The available sociodemographic data does allow some assessment of the population (e.g., typical-to-older ampution group, age distribution, etc.) Data is avaiable, by level of amputation, for % morta…	1451	1072						379 (defined as foot & ankle, Symes excluded)	PVD and/or DM	Reported for whole lower limb amputee sample or by discharge destination. Therefore, can only make inferences about partial foot and transtibial subjects based on entire lower limb amputee sample. 83% diabetes.	Reported for whole lower limb amputee sample or by discharge destination. Therefore, can only make inferences about partial foot and transtibial subjects based on entire lower limb amputee sample. 52% males	Reported for whole lower limb amputee sample or by discharge destination. Therefore, can only make inferences about partial foot and transtibial subjects based on entire lower limb amputee sample: mean age 73.7 years. No SD reported.	Number comorbidities, age at first amputation, Age at death, Number admissions within 12 months post index amputation, Number of amputations related admissions 12 months post index amputation	Age, sex, race	950	PVD	0.79	Not reported for PFA/TTA cohorts, but overall lower limb amputee sample was 52% male	Not reported for PFA/TTA cohorts, but overall lower limb amputation sample, mean age 73.7 years. No SD reported.	Number comorbidities, age at first amputation, Age at death, Number admissions within 12 months post index amputation, Number of amputations related admissions 12 months post index amputation	Race, age, sex	1 year mortality after index amputation (%)	Number and percent; probabilities based on multivariate logistic regression models that controlled for confounding influence of a wide range of social and demographic factors confounding comparison between discharge destinations, not amputation levels.	1 year mortality Whole sample Toe (22.8%) Foot and/or ankle (28.5%) 1 year mortality in Diabetics Toe (22.7%) Foot and/or ankle (27.1%)* 1 year mortality in non-diabetics Toe (24.5%) Foot and/or ankle (35.4%)	1 year mortality in whole sample Transtibial (35.5%) 1 year mortality in diabetics Transtibial (34.0%)* 1 year mortality in non-diabetics Transtibial (41.5%)	Whole sample Toe vs TTA (12.7%) Foot and/or ankle vs TTA (7% ) Diabetics Toe vs TTA (11.3% ) Foot and/or ankle vs TTA (7% ) Non-diabetics Toe vs TTA (17.5%) Foot and/or ankle vs TTA (6.1% )	Not reported	Mortality at 12 months were higher with more proximal levels of amputation. Mortality rates were significantly worse in those with diabetes (compared to those without) in the foot and/or ankle as well as the transtibial amputation groups. No inferential analysis comparing mortality rates between the transtibial and partial foot groups.
Mortality	Evans, K. K., C. E. Attinger, A. Al-Attar, C. Salgado, C. K. Chu, S. Mardini and R. Neville	2011	The importance of limb preservation in the diabetic population	Journal of Diabetes & its Complications	25	4	227-231	OBJECTIVE: Limb salvage in the diabetic population is complex, controversial, costly and variable throughout the world. Within the diabetic population, the indications and morbidity surrounding major leg amputation have not been well defined. RESEARCH DESIGN AND METHODS: A retrospective study of the Georgetown Limb Salvage Registry was conducted to determine outcomes in diabetic patients undergoi…	The purpose of this study was to assess our multidisciplinary approach to limb salvage by (1) analyzing the limb salvage rate of the patients requiring either transmetatarsal (TMA), Chopart or Lisfranc amputation for closure and (2) comparing and contrasting these populations to determine risk factors and indications for major leg amputation.	Cohort - Retrospective	USA, University Medical Centre Washington DC/ Georgetown Limb Salvage Register/ limb centre and hospital chart records to demographic, etiology, other conditions.	Convenience	Included on limb salvage register between 1990-1999, ambulatory patient with limb threatening foot pathology, forefoot/midfoot breakdown requiring treatment with transmetatarsal, Lisfranc or Chopart amputation (or higher). Patients who were bedridden or non-ambulatory were excluded as were those who did not go on to amputation or had incomplete records (n=16 of 129 people that met the other inclu…	Usual care	Retrospective review of charts for people with different levels of partial foot and transtibial amputation. While the aim was to compare limb salvage rates with three levels of partial foot amputation AND to compare these populations for risk factors, the study really focuses on comparing the partial foot amputee cohort (all levels combined) with a transtibial amputee cohort. Numerous paired comp…	88			58	17	13			DM	100	0.57	70 (no SD)	Diabetes, neuropathy, coronary arterial disease, Hypertension, peripheral vascular disease, chronic renal failure, contralateral amputation, Charcot collapse	Age, sex	25	DM	100	0.76	69 (no SD reported)	Diabetes, neuropathy, coronary arterial disease, Hypertension, peripheral vascular disease, chronic renal failure, contralateral amputation, Charcot collapse	Age, sex	2 year mortality	Simple count of number (%) amputees died at specific time point	20% of partial foot amputees died by 2 years.	No point estimate reported for the transtibial amputee mortality (i.e., 52% of transtibial amputees dead at time of final study with average survival of 640 days following transtibial amputation).			2-year mortality rate in PFA group was 20%. No breakdown by level of PFA. No point estimate for TTA sample given that the percentage that died at end of study, and average days survival, were reported instead.
Mortality	Glaser, J. D., R. P. Bensley, R. Hurks, S. Dahlberg, A. D. Hamdan, M. C. Wyers, E. L. Chaikof and M. L. Schermerhorn	2013	Fate of the contralateral limb after lower extremity amputation	Journal of Vascular Surgery	58	6	1571-1577.e1571	OBJECTIVE: Lower extremity amputation is often performed in patients where both lower extremities are at risk due to peripheral arterial disease or diabetes, yet the proportion of patients who progress to amputation of their contralateral limb is not well defined. We sought to determine the rate of subsequent amputation on both the ipsilateral and contralateral lower extremities following initial…	Aim not stated in introduction, but in abstract: We sought to determine the rate of subsequent amputation on both the ipsilateral and contralateral lower extremities following initial amputation.	Cohort - Retrospective	USA, Boston, Chart review.	Convenience	Primary admission diagnosis code (ICD9) was related to nonhealing wounds with or without peripheral arterial disease or ischemic rest pain. Lower extremity ampuation at any level (84.10-84.19) between 1998-2010 at single institution.	Usual care	Retrospective chart review of patients admitted for minor (toe or transmetatarsal amputation) or major (through ankle or more proximal) due to non-healing wounds. Primary outcomes related to major amputation; secondary outcomes include ipsilateral reamputation, contralateral reamputation and mortality. Estimates generated from Kaplan-Meier estimates.	1140	Not reported		Not reported				Only toe and transmetatarsal amputations, but no number by level of 'minor' amputation	PVD and/or DM	73.6	67.3	66.6±13.5	Diabetic, chronic renal failure, end-stage renal disease, hypertension	Age, sex, non-white race								Estimated percentage died at 1, 3, 5 years	Kaplan Meier	Mortality 1 year: 17.0% 3 years: 29.1% 5 years: 49%				Most reamputations occur within first year after index minor amputation (toe/TMA). Values likely underestimate because only index toe/TMAs included.
Mortality	Griffin, K. J., T. S. Rashid, M. A. Bailey, S. A. Bird, K. Bridge and J. D. Scott	2012	Toe amputation: a predictor of future limb loss?	Journal of Diabetes & its Complications	26	3	251-254	BACKGROUND: Digital toe amputation is a relatively minor surgical procedure but there is a historical view that it is the "first stage in a predictable clinical course" leading to eventual limb loss. There is a paucity of contemporaneous data on the long-term outcomes of patients undergoing toe amputation. We aim to study the experience from our institution, focussing on the risk factors for prog…	There is a paucity of contemporaneous data on the mid to long-term outcomes of patients undergoing toe amputation and the clinical factors which may help predict further amputation and/or limb loss. We aim to study the experience from our institution, by conducting a retrospective review of our practice.	Cohort - Retrospective	UK, Leeds University Hospital, Operative database, theatre records and patient medical history.	Convenience	Toe amputation (either single toe or multiple toes) between 2004-2008 at Leeds Hospital (exact name not clear), with complete records.	Usual care	Retrospective review of surgical/hospital records of people who underwent amputation of the toe(s) between 2004-2008. Primary endpoints included "further amputation (either below ankle (i.e., minor) or above ankle (i.e., major), subsequent limb loss and mortality." Median follow up 790 days (317-1791 days); affecting reporting of reamputation because no timepoint could be established. Mortality a…	63	63							PVD and/or DM	0.683	0.87	69 (no SD), range: 62-76.5 years.	Diabetes, Hypertension, smoking status, conorarty heart disease, cerebrovascular disease, renal failure, wound healing (e.g., vacuum therapy or involvement of hospital tissue viability team) use of revascularisation.	Age, sex, ethnicity								Mortality at 30 days and 1 year for toe amputees (%)	Simple count of number (%) amputees died at specific time point	30 day: 3.17%, 1 year: 19%
Mortality	Hambleton, I. R., R. Jonnalagadda, C. R. Davis, H. S. Fraser, N. Chaturvedi and A. J. Hennis	2009	All-cause mortality after diabetes-related amputation in Barbados: a prospective case-control study	Diabetes Care	32	2	306-307	OBJECTIVE: To determine the mortality rate after diabetes-related lower-extremity amputation (LEA) in an African-descent Caribbean population. RESEARCH DESIGN AND METHODS: We conducted a prospective case-control study. We recruited case subjects (with diabetes and LEA) and age-matched control subjects (with diabetes and no LEA) between 1999 and 2001. We followed these groups for 5 years to assess…	Aim not stated in introduction, but in abstract: To determine the mortality rate after diabetes-related lower-extremity amputation (LEA) in an African-descent Caribbean population.	Case control	Barbados.	Convenience	Self-reported as black race, diabetes.	Usual care	Case-control in which survival probabilities (Kaplein-Meier) and age-standardized all-cause mortality rates per 1000-person years were reported for a Carribean population with diabetes. Amputees convenience sampled through hospital surgical ward. Simple random sampling used to identify controls from electoral records for screening to meet inclusion.	123								DM	100	Sex not reported with breakdown by amputation level. Some assessment of representivenss possible because case subjects (i.e., all lower extremity amputations) had 44.9% males.	67.1±13.2	Diabetes, footwear type, symptoms of peripherial arterial disease, blood pressure, height, weight, body circumferences, foot pulses to identify peripheral vascular disease and Doppler for ankle blood pressure. Ankle Brachial Index, composite peripheral vascular disease index, presence of peripheral neuropathy and impaired protective sensation. Blood for GHb - see Hennis 2004 where methods explain…	Age, sex, self-assigned racial group, life style behaviours - see Hennis 2004 where methods explained more fully -	47	DM	1	Sex not reported with breakdown by amputation level. Some assessment of representivenss possible because case subjects (i.e., all lower extremity amputees) had 44.9% males.	Age not reported with breakdown by amputation level. Some assessment of representivenss possible because 'major' (which included transtibial as well as transfemoral amputees) had mean age of 75.7±10.3 years.	Diabetes, footwear type, symptoms of peripherial arterial disease, blood pressure, height, weight, body circumferences, foot pulses to identify peripheral vascular disease and Doppler for ankle blood pressure. Ankle Brachial Index, composite peripheral vascular disease index, presence of peripheral neuropathy and impaired protective sensation. Blood for GHb - see Hennis 2004 where methods explain…	Self-assigned racial group, life style behaviours - see Hennis (2004) where methods were explained more fully.	All cause mortality at 3 and 6 months and 1 and 5 years post index amputation in partial foot amputees and transtibial amputees (%)	Kaplan Meier estimates for probability at discrete time points, plus age standardized all cause mortality rate for partial foot ampuation and transtibial amputation with 95%CI, mortality rate ratio between partial foot amputation and major amputation with p-values.	3 months: 8% 6 months: 14% 1 year: 19% 5 years: 41% Age-adjusted all-cause mortality rates per 1000 person-years PFA: 113.4 (95%CI 85.2-150.9)	3 months: 32% 6 months: 36% 1 year: 40% 5 years: 72% Age-adjusted all-cause mortality rates per 1000 person-years TTA: 205.9 (95%CI 142.8-296.8)		Yes (p<0.001) for comparison of rate ratios for major/minor groups. Otherwise, significance not relevant for Kalpan-Meier estimates or presentation of mortality rates.	Mortality rate after TTA was almost twice that following PFA. Age-adjusted all-cause mortality rates per 1000 person-years Controls 36.4 (95%CI 25.6-51.8) Primary causes of death for all cases: sepsis (49%), cardiac disease (45%), pneumonia (17%) and renal problems (14%)
Mortality	Izumi, Y., K. Satterfield, S. Lee, L. B. Harkless and L. A. Lavery	2009	Mortality of first-time amputees in diabetics: a 10-year observation	Diabetes Research & Clinical Practice	83	1	126-131	AIMS: We analyze mortality of first-time diabetic amputees by stratifying by level of amputation, differentiating short-term and long-term mortality. METHODS: We evaluated 277 diabetic patients who received their first lower extremity amputation (LEA) during 1993-97. Subjects were followed until December 2003, and categorized by level of amputation. We compared the mortality difference by level f…	Our aims were to: (1) stratify mortality by level of amputation, (2) evaluate differences between short-term (< 10 months) and long-term mortality (>10 months), and (3) evaluate the association between comorbid conditions and death for each amputation level at different follow up periods for first time diabetic amputees.	Cohort - Retrospective	USA, Texas, University hospital.	Convenience	Diabetes, non-traumatic amputation, first time lower extremity amputation (not reamputations).	Not reported	Retrospective cohort study of people with diabetes undergoing first ever lower extremity amputation. Outcome measure was short-term (<10 months) and long term (> 10 months) mortality. Mortality rates estimated from Kaplan-Meier curves and compared between different levels of partial foot amputation (and 'major' amputation). Associations drawn between mortality rates and comorbidities (e.g., cereb…	213	61					114	38 midfoot including transmetatarsal, Lisfranc and Chopart	DM/PVD	100	Toe: 60.7%, Ray: 71.1%, Midfoot: 81.6%	Toe: 53.3±10.9 Ray: 52.4±10.5 Midfoot: 51.7±9.5	Peripheral arterial disease, end-stage renal disease, L/R bypass surgery	Gender, ethnicity, smoking status								10-month and 5-year mortality by level of partial foot ampuation	Kalpan-Meier survival analysis. Comparisons between amputee groups included age and sex as covariants in regression model so these demographic differences were controlled for.	The point estimates of 5-year mortality were toe 26.2%, ray 15.8%, midfoot (TMA/Lisfranc/Chopart) 21%, and major 36%. For short-term mortality (< 10 months), the point estimates were toe 6.6%, ray 4.4%, midfoot 10.5%, and major 18.2%. No differences in mortality rates between levels of partial foot amputation at any of the time points. Influence of comorbid conditions (PAD, CVD, CVA and ESRD) rep…				10 month and 5 year mortality rates comparable between groups with PFA. Effect of comorbid conditions was large but highly variable.
Mortality	Jindeel, A. and K. A. Narahara	2012	Nontraumatic amputation: incidence and cost analysis	International Journal of Lower Extremity Wounds	11	3	177-179	Lower extremity amputation (LEA) is devastating for those affected and a significant factor in health care costs. Although the overall incidence of amputation has been declining, the decline is not universal. The objectives of this study were to identify patients with nontraumatic amputation at Harbor-UCLA Medical Center (HUMC) from January 2000 to January 2007, to calculate their 1-year and 5-ye…	The objectives of this study are to characterize the incidence of nontraumatic amputations at Harbor-UCLA Medical Center (HUMC), calculate the 1-year and 5-year mortality rates after such amputations, and estimate the direct costs of these amputations.	Cohort - Retrospective	USA, Los Angeles County, tertiary hospital.	Convenience	Lower extremity amputation at Harbor UCLA medical centre between 2000-2006 without trauma, neoplasm or amputation elsewhere. Children also excluded.	Usual care	Retrospecive review of medical centre database to identify people with lower extremity amputation. Count and percentage mortality presented for each year and an average at 1 and 5 years.	594								Unclear	0.925	Not reported for partial foot amputation level. For entire lower extremity sample, 75% were male.	Not reported for partial foot amputation level. For entire lower extremity sample, mean age approx 55 years (no SD) given, age stratified by sex.	Diabetes	Sex, age, race,								Average number percentage mortality at 1- and 5-years in partial foot amputees (annual rates reported too)	Count and percentages	1 year: mean 9.1%, 5 year: mean 19.2%				Increasing age was a risk factor for 1 year mortality.
Mortality	Jones, R. N. and W. P. Marshall	2008	Does the proximity of an amputation, length of time between foot ulcer development and amputation, or glycemic control at the time of amputation affect the mortality rate of people with diabetes who undergo an amputation?	Advances in Skin & Wound Care	21	3	118-123	OBJECTIVES: The main purpose of the authors' research was to compare the 3- and 5-year mortality rates of diabetic patients who have undergone a lower-extremity amputation, evaluating the proximity of the amputation in 3 groups (toe and foot amputation, BKA, and AKA), the timing of the amputation (within or after 2 years of the onset of the foot ulcer), and the effect of glycemic control at the t…	To compare the 3- and 5-year mortality rates of diabetic patients who have undergone a lower-extremity amputation, evaluating the proximity of the amputation in 3 groups (toe and foot amputation, transtibial, transfemoral), the timing of the amputation (within or after 2 years of the onset of the foot ulcer), and the effect of glycemic control at the time of amputation, regardless of the level of…	Cohort - Retrospective	USA, Illiana Inpatients of Veterans Centre.	Convenience	Diabetes, diabetic foot ulcer, an amputation and electromyography studies, femoral duplex (angiography study).	Not reported	Retrospective review of charts for men with diabetic foot ulcers requiring amputation who were once inpatients of a veterans hospital. Compared 3 and 5 year mortality rates for three groups: toe amputation, transtibial and transfemoral. Age and HbA1c level reported for each group. All mortality data were reported as proportions. Interested in whether glycemic control and time between ulcer and am…	29	29							PVD and/or DM	100	100	71±6.8	Coronary artery disease or cerebral vascular disease, hypertension, renal insufficiency, and hyperlipidemia. Neurpoathy (loss of vibration, decreased reflexex, numbness or tingling. & protective sensation (10g Semms-Weinstein monofilament), peripheral vascular disease, Hemoglobin A1C level,	Age, sex	30	PVD and/or DM	1	1	70.8±7.2 years	Coronary artery disease or cerebral vascular disease, hypertension, renal insufficiency, and hyperlipidemia. Neurpoathy (loss of vibration, decreased reflexes, numbness or tingling, protective sensation (10g Semms-Weinstein monofilament), peripheral vascular disease, Haemoglobin A1C level.		3- and 5-year mortality in toe as well as transtibial amputee groups (%)	Simple count of number and percentage that died at specific time point	3-year mortality: 13.8% 5-year mortality: 41.4%	3-year mortality: 33.3% 5-year mortality: 63.3%		Only main effects for the Chi-Squared reported comparing toe, transtibial amputation and transfemoral amputation.	Mortality at 3 and 5 years was higher in TTAs than toe amputees.
Mortality	Kono, Y. and R. R. Muder	2012	Identifying the incidence of and risk factors for reamputation among patients who underwent foot amputation	Annals of Vascular Surgery	26	8	1120-1126	BACKGROUND: Many patients who have lower-extremity amputations secondary to peripheral vascular disease or diabetes require reamputation eventually. This study was designed to identify the incidence of and risk factors for ipsilateral reamputation after forefoot amputation, to evaluate whether postoperative infection increases the risk of reamputation, and to evaluate whether the risk of reamputa…	We aimed to (1) identify the incidence of and risk factors for ipsilateral reamputation after forefoot amputation; (2) evaluate whether postoperative infections increases the risk of reamputation; and (3) evaluate whether the risk of reamputation was reduced by the duration of antimicrobial therapy after amputation.	Cohort - Retrospective	USA, VA Pittsburg.	Convenience	Non-traumatic, foot amputation (both cause and amputation level not operationally defined), foot amputation in VA hospital Pittsburg between January 2002 and December 2004 (presume beginning and end of year given no dates were specified).	Usual care	Retrospective review of people with non-traumatic, foot amputation (both cause and amputation level not defined) but appear to be forefoot (see aims) or forefoot and hindfoot (see caption Table 1). A wide range of factors thought to affect ipsilateral reamputation and mortality rates were recorded as part of data extraction. Study didn't report incidence of reamputation but rather a percentage of…	116							amputation level not operationally defined (Table 1 caption suggests a mix of hindfoot, midfoot, metatarsal and toe amputations)	Unclear	0.802	0.991	66.8±11.0	Urgency of surgery, site of amputation, operation time, wound closure, hospitalization day, current smoking, Type 2 diabetes, diabetic neuropathy, end-stage renal disease, history coronary arterial disease, immuniosuppresent used, history contralateral/ipsilateral amputatuion, history of revascularisation, physical exam, lab tests, malnutrition, ABI, imaging studies, cultures, use of antibiotics …	Age, sex,								All-cause mortality at 3 years	Counts and percentages	45.7% died in 3 years post index amputation				Descriptive study reporting 3 year all cause mortality.
Mortality	Kristensen, M. T., G. Holm, K. Kirketerp-Moller, M. Krasheninnikoff and P. Gebuhr	2012	Very low survival rates after non-traumatic lower limb amputation in a consecutive series: what to do?	Interactive Cardiovascular & Thoracic Surgery	14	5	543-547	The aim of this retrospective study was to evaluate factors potentially influencing short- and long-term mortality in patients who had a non-traumatic lower limb amputation in a university hospital. A consecutive series of 93 amputations (16% toe/foot, 33% trans-tibial, 9% through knee and 42% trans-femoral) were studied. Their mean age was 75.8 years; 21 (23%) were admitted from a nursing home a…	The aim of this study was to evaluate the factors potentially influencing short- and long-term survival rates of patients with a non-traumatic lower limb amputation.	Cohort - Retrospective	Denmark, Tertiary hosputal.	Convenience	Non-traumatic amputation in 2009 at the Hvidovre Hospital Denmark; toe/foot, transtibial, through-knee or transfemoral amputation.	Usual care	Retrospective review of hospital charts for people undergoing non-traumatic lower extremity amputation in 2009 in a Danish hospital. 30-, 90- and 365 day-mortality rates (counts and percentages) reported for a old and likely unwell sample (given large proportion were in nursing home, had multiple comorbidities, and required through-knee or above-knee amputation) resulting in very high rates of mo…	15								PVD and/or DM	0.53	0.8	73.8±14.5	Contralateral amputation, cause of amputation, ASA scale (anesthology scale), and number of comorbidities (not operationally defined or measured using valid instrument), length of stay	Age, sex, residence (i.e., home, nursing home)	31	PVD and/or DM	0.387	0.58	73.9±12.6	Contralateral amputation, cause of amputation, ASA scale (anesthesiology scale), and number of comorbidities (not operationally defined or measured using valid instrument), length of stay	Age, sex, residence (i.e., home, nursing home)	Number and percentage 30 day and 1 year mortality in partial foot and transtibial groups; other mortality rates (e.g., perioperative) reported for sample as a whole, not by level of amputation.	Counts and percentages for mortality rates	30-day mortality (20%) 1 year mortality (40%)	30 day mortality (29%) 1 year mortality (58%)			PFA have lower 30- and 365-day mortality compared to TTA.
Mortality	Mayfield, J. A., G. E. Reiber, C. Maynard, J. M. Czerniecki and et al.	2001	Survival following lower-limb amputation in a veteran population	Journal of Rehabilitation Research and Development	38	3	341-345	We sought to describe the common demographic and comorbid conditions that affect survival following nontraumatic amputation. Survival following lower-limb amputation is impaired by advancing age, cardiovascular and renal disease, and proximal amputation level.	We undertook this analysis to describe the determinants of survival following amputation in US veterans discharged from the Veterans Health Administration facilities in 1992.	Cohort - Retrospective	USA, Seattle, VA centre.	Convenience	Veterans discharged in 1992 with toe, transmetatarsal, transtibial or transfemoral levels. Did not have amputation due to 'major' trauma or cancer.	Usual care	Retrospective review of Veterans Administration records identifing mortality following discharge for amputation in 1992. The follow up point was 6 years later. Probability of mortality estimated from Kaplan-Meier analysis.	2234	1795		439					Unclear	Reported only for the whole lower extremity sample (61%), not by level of amputation.	Reported only for the whole lower extremity sample (99%), not by level of amputation.	Reported only for the whole lower extremity sample (66 No SD), not by level of amputation.	Diabetes, renal disease, cardiovascular disease (dichotomised by diagnosis congestive heart failure)	Age, sex, race, married	1381	Unclear	Reported only for the whole lower extremity sample (61%), not by level of amputation.	Reported only for the whole lower extremity sample (99%), not by level of amputation.	Reported only for the whole lower extremity sample (66, No SD), not by level of amputation.	Diabetes, renal disease, cardiovascular disease (dichotomized by diagnosis of congestive heart failure)	Race, married	Percentage mortality 30-day and 5-years by level	Kalpan-Meier survival analysis	Toe 30 day mortality: 1.7% 3-year mortality: Not reported by level 5-year mortality: 46% Transmetatarsal 30 day mortality: 2.7% 3- year mortality: Not reported by level 5-year mortality: 45%	TTA 30 day mortality: 7.0% 3-year mortality: Not reported by level 5-year mortality: 56%			Based on the descriptive data, 30 day mortality was comparable in toe and TMA, but a bit higher in TTA. At 5 years, toe and TMA had comparable rates of mortality, which were marginally worse for TTAs.
Mortality	Sandnes, D. K., M. Sobel and D. R. Flum	2004	Survival after lower-extremity amputation	Journal of the American College of Surgeons	199	3	394-402	BACKGROUND: Lower extremity amputation has long been considered an end-of-life event and it is unclear if survival after amputation has improved over time. STUDY DESIGN: A retrospective cohort comprised from a statewide, hospital discharge database was used to determine if survival after amputation improved with time. The cohort included all patients (older than 18 years) with nontraumatic, lower…	The purpose of this study was to determine if survival after lower extremity amputation has improved over time across a broad population of patients.	Cohort - Retrospective	USA, Washington State/ Washington State Comprehensive Hospital Abstract reporting System (CHARS).	Convenience	Over 18 years, non-traumatic and non-neoplasm related amputations.	Not reported	Based on a statewide, population-based hospital discharge database, authors determined incidence rate, and probability of mortality in three different time periods from 1987-2000. Incidence-rate and Kaplan-Meier estimates not able to be provided by authors and, as such, only data in figures are available. Figure 4 includes 'percentage alive' but it isn't clear how this data were derived.	4434	Not reported		Not reported					Unclear	66	61.1	66±15.5	Charlston comorbidity index, diabetes, COPD, Renal disease, diabetic complications (retinopathy)	Age, sex	5298	Unclear	0.63	0.619	68±15.51	Charlson comorbidity index, diabetes, COPD, renal disease, diabetic complications (retinopathy)	Age, sex	30 days, 1 year and 5 years survival in transtibial and toe/transmetatarsal amputees (Figure 4)	Not clear. The only relevant data are the 'percentage alive' reported in Figure 4. It is not clear from the manuscript (nor could it be clarified from correspondance with the authors - as at 9.2.2016) whether the data in Figure 4 was derived from the Kaplan-Meier probabilities of reports on the 25% of the sample that were followed for 5 years. Seems that the results in Figure 4 are likely to be a…	30 day Mortality (inverse % survival) 1987-89 Toe/Transmetatarsal: 3.7%, 1990-94 Toe/Transmetatarsal: 3.6%, 1995-2000 Toe/Transmetatarsal: 2.8%, 1 year Mortality (inverse % survival) 1987-89 Toe/Transmetatarsal: 17.4%, 1990-94 Toe/Transmetatarsal: 16.9%, 1995-2000 Toe/Transmetatarsal: 13.5%, 5 year Mortality (inverse % survival) 1987-89 Toe/Transmetatarsal: 45.3%, 1990-94 Toe/Transmetatarsal: 45.…	30 day Mortality (inverse % survival) 1987-89 TTA: 9.5% 1990-94 TTA: 6.9% 1995-2000 TTA: 6.1% 1 year Mortality (inverse % survival) 1987-89 TTA: 25.6% 1990-94 TTA: 24% 1995-2000 TTA: 19.6% 5 year Mortality (inverse % survival) 1987-89 TTA: 55.0% 1990-94 TTA: 55.2% 1995-2000 TTA: 40.0%		Not reported	Unclear how mortality was calculated but data as presented suggest toe/TMA have a slightly better survival, at 30 days, 1 year and 5 years compared to TTA at all time points.
Mortality	Sheahan MG, Hamdan AD, Veraldi JR, McArthur CS, Skillman JJ, Campbell DR, et al.	2005	Lower extremity minor amputations: The roles of diabetes mellitus and timing of revascularization	J Vasc Surg	42		476-80	Introduction: Despite the frequent performance of minor foot amputations in patients with lower extremity vascular disease, little is known regarding the rate of conversion to major amputations and the role of bypass graft timing in relation to amputation. Methods: Between January 1990 and December 2001, 670 patients underwent 920 minor amputations (interphalangeal, ray, or transmetatarsal) on 74…	The purpose of this study is to review a 12-year experience with lower extremity minor amputations and investigate which risk factors best predict patient survival and limb loss. As diabetic and nondiabetic patients have been shown to have similar healing rates after minor foot amputations, we have included both groups in this series. Our hypothesis is that a carefully planned multidisciplinary a…	Cohort - Retrospective	USA, New Orleans, data from surgical register and patient records.	Convenience	Interphalangeal, ray or transmetatarsal amputations between 1.1.1990-15.12.2001; at Beth Israel Medical Centre New Orleans; peripheral vascular disease.	Usual care	Retrospective review of surgical/medical records at a single hospital over 12 year period looking at outcome from partial foot amputation (i.e., interphalangeal, ray or transmetatarsal); looking at 30 day, 1- and 5-year mortality with no breakdown by level of partial foot amputation.	670 patients/774 limbs	466 interphalangeal		159			122		PVD and/or DM	0.919	0.699	Not reported	Diabetes, tabacco use, hypertension, conorary arterial disease, renal insufficiencey, dialysis dependent	Sex								30-day operative mortality; 1 and 5 year survival rate	Kaplan Meier estimates	30 day: 2.9% (22/747 limbs); 3.3% (22/670 people) 1 year: 16.1% 5 year: 56.5%				Mortality rate increased over time, from 30 days post-op, to 1 and 5 years.
Mortality	Stone, PA; Back, MR; Armstrong, PA; et al.:	2005	Midfoot amputations expand limb salvage rates for diabetic foot infections.					The persistent high incidence of limb loss resulting from advanced forefoot tissue loss and infection in diabetic patients prompted an evaluation of transmetatarsal (TMA) and transtarsal/midfoot amputations in achieving foot salvage at our tertiary vascular practice. Over the last 8 years, 74 diabetic patients required 77 TMAs for tissue loss and/or infection. Twelve (16%) of the patients had a c…	We report our recent experience with transtarsal amputation to salvage nonhealing TMAs in diabetic patients.	Cohort - Retrospective	USA, Florida, Veterans hospital.	Not clear	Not clear	Usual care	Study very difficult to follow. Suggest a retrospective review of records from 74 people with an index transmetatarsal amputation. Outcomes related to healing and mortality reported at different time points.	74			74					PVD and/or DM	100	86.5	64 (No SD, range 45-8)	Tobacco use,hyperlipidemia, end-stage renal disease, contralateral major amputation ('major' not operationally defined);	Age, sex								Perioperative (60 day), 1- 3- and 5-year mortality (%)	Kaplan Meier	Perioperative (60 days): 5.4% 1 year: 28% 3 years: 31% 5 years: 70%
Mortality	Vamos, E. P., A. Bottle, A. Majeed and C. Millett	2010	Trends in lower extremity amputations in people with and without diabetes in England, 1996-2005	Diabetes Research & Clinical Practice	87	2	275-282	AIMS: To examine trends in non-traumatic lower extremity amputations over a 10-year-period in people with and without diabetes (DM) in England. METHODS: All individuals admitted to NHS hospitals for non-traumatic amputations between 1996 and 2005 in England were identified using hospital activity data. Postoperative and 1-year mortality were examined between 2000 and 2004. RESULTS: There was a re…	The objective of this study was to describe time trends in lower extremity amputation procedures in people with and without diabetes between 1996 and 2005 using national hospital admission data from all NHS hospitals in England. We also describe perioperative and 1-year mortality between 2000 and 2004.	Cohort - Retrospective	UK, NHS Hospital Episode Statistics database covering public admissions to NHS.	Convenience	Amputation surgery in public system (NHS), non-traumatic lower extremity amputation between 1996-2006.	Usual care	Retrospective review of NHS admissions database for lower extremity amputation procedures between 1996-2006. Outcomes were number and percentage that died at 30- days and 1 year post index amputation. Age- and sex-standardized incidence rate per 100,000 population stratified by amputation level (i.e., minor vs major) as well as presence/type of diabetes (i.e., Type 1, Type 2 and no DM). Minor amp…	5487 (jn 2005)								Unclear	Not reported for partial foot sample, but for lower extremity amputation group as a whole. 40% of sample had diabetes (13.5% type 1, 26.5% type 2).	Proportion of males reported by diabetes type for 1996/1997: type 1: 68.6% males, type 2: 72.1% males, no diabetes: 38.9% males. And 2005/2006: type 1: 72.7%, type 2: 74.3%, no diabetes 43.8%.	Mean age and interquartile range with breakdown by diabetes type for 1996/1997 (type 1: 61.7; type 2: 68.0; no diabetes: 65.4 years) and 2005/2006 (type 1: 57.2, type 2: 67.8, no diabetes: 66.3). Interquartile range reported in Table 1.	Diabetes - type I and Type II, no diabetes	Age, sex, socioeconomic status (from index of multiple deprivation)								Number and percentage that died at 30-days and 1 year post index amputation	Counts	30 day Total 2000/1, 2.3% 2004/5, 3.1% Type I DM 2000/1, 3.4% 2004/5, 2.1% Type II DM 2000/1, 2.8% 2004/5, 3.8% No DM 2000/1, 1.8% 2004/5, 2.9% 1 year Total 2000/1, 13.5% 2004/5, 15.5% Type I DM 2000/1, 17.5% 2004/5, 14.1% Type II DM 2000/1, 18.1% 2004/5, 19.9% No DM 2000/1, 10.4% 2004/5, 12.7%				Proportion of sample that died at 30-days and 1 year post partial foot amputation remained stable over time with little difference as a result of presence or type of diabetes.
Mortality	Winell, K., M. Venermo, T. Ikonen and R. Sund	2013	Indicators for comparing the incidence of diabetic amputations: a nationwide population-based register study	European Journal of Vascular & Endovascular Surgery	46	5	569-574	OBJECTIVE: To test various indicators for comparing the outcomes of diabetic foot care. DESIGN: All 396,317 patients treated with hypoglycaemic medication in Finland were followed up based on nationwide registers on hospital discharges and causes of death during 1997-2007. MATERIALS AND METHODS: The crude and standardized incidences of lower extremity amputations (LEAs), the minor-major ratio of …	In the current study, we aimed at studying several outcome indicators for evaluating the effectiveness of foot care in the presentation of lower extremity amputation. The applicability of these indicators for detecting regional and temporal variation in foot care over time was tested among Finnish patients with diabetes.	Cross sectional	Finland, national registers (i.e., Hospital discharge registers, reimbursment registers of the Social Insurance Institution, National cause of death register).	Convenience	National residents (Finland), diabetics (ICD-8 and ICD-9 code 250 and with ICD-10 codes E10-14 - excluded gestational diabetics), lower extremity amputation (excluding trauma, neoplasms), includes ALL amputation (index and reamputations).	Usual care	Registrants were first identified from a drug register of people with diabetes (identified as people who required medication for glucose control). These registrants were then cross-matched to a database of people who underwent lower extremity amputation. Care not to confuse with outcomes reported for 2 year survival with intact leg. While the incidence data may seem appropriate at first glance, t…	1997:520, 2007:706								DM	100	Not reported	Not reported	Diabetes.									2 year survival following minor (PFA), % and 95%CI, for Finland as well as discrete geographic regions in 1997-2000 and 2004-2007.	Mortality rates were age- and sex- standardized to either the geographic region of interest (e.g., Helsinki) of the whole Finnish population. 2 year survival were calculated using the Kaplan-Meier method (inverse to obtain a mortality rate). Results presented as a proportional survival with 95%CI.	2 year survival: 1997-2000: 64.5%, 60.5-68.7% 2004-2007: 65.4%, 61.6-69.3% Used survival data to determine mortality (i.e., 100-survival rate = mortality rate) 2 year mortality: 1997-2000: 35.5%, 95%CI 31.3-39.5% 2004-2007: 34.6%, 95%CI 30.7-38.4%				2 year mortality rate associated with partial foot amputation is 35%, with little variability as evidenced by the narrow confident interval (95%CI 31-38).

## Sheet: Drop_down_list
Dillon	RCT	Random (irrespective of method of randomisation)		PVD		Yes	Yes	Not applicable	Not applicable	Not applicable	Epidemiology (incidence, prevalence, rate of amputation)						Complete
Quigley	Cohort - Prospective	Convenience		DM		No	No	Yes	Yes	Yes	Mortality						Awaiting author reply
Fatone	Cohort - Retrospective	Purposive		PVD and/or DM		Unclear		No	No	No	Reamputation						Query with authors
	Before and after	Cluster		Unclear		Not reported			Not addressed	Not addressed	Time between index and reamputation						Reviews collated
	Case control	Snowball		Not reported		Not applicable					Wound healing and complications						Reviews complete
	Cross sectional	Unable to determine									Mobility						In second review
	Case study	HELP?									Function						In first review
	Unable to determine										Quality of life						Assign reviewers
	HELP?										Psychosocial						exclude
											Other
